1  
2  
3  
4  
5  
6  
7  
8  
9  
10  
11  
12  
13  
14  
15  
16  
17  
18  
19  
20  
21  
22  
23  
24  
25  
26  
27  
28  
29  
30  
31  
32  
33  
34  
35  
36  
37  
38  
39

**Fatty acid-binding proteins and fatty acid synthase influence glial reactivity and promote the formation of Müller glia-derived progenitor cells in the avian retina**

Warren A. Campbell<sup>1</sup>, Allen Tangeman<sup>1</sup>, Heithem M. El-Hodiri<sup>1</sup>, Evan C. Hawthorn<sup>1</sup>, Maddie Hathoot<sup>1</sup>, Thanh Hoang<sup>2</sup>, Seth Blackshaw<sup>2</sup> and Andy J. Fischer<sup>1\*</sup>

<sup>1</sup> Department of Neuroscience, College of Medicine, The Ohio State University, Columbus, OH

<sup>2</sup> Solomon H. Snyder Department of Neuroscience, Johns Hopkins University School of Medicine, Baltimore, MD.

**\*corresponding author:** Andy J. Fischer, Department of Neuroscience, Ohio State University, College of Medicine, 3020 Graves Hall, 333 W. 10<sup>th</sup> Ave, Columbus, OH 43210-1239, USA. Telephone: (614) 292-3524; Fax: (614) 688-8742; email: [Andrew.Fischer@osumc.edu](mailto:Andrew.Fischer@osumc.edu)

**Abbreviated title:** FABPs and FASN in Müller glia and Müller glia-derived progenitor cells

**Number of pages:** 63 **Number of Figures:** 12

**Number of Supplemental Figures:** 3

**Number of Tables:** 1

**Number of Supplemental tables:** 5

**Author Contributions:** WAC designed and executed experiments, gathered data, constructed figures and contributed to writing the manuscript. AT and MH executed experiments, and gathered data. HE coordinated experiments, performed bioinformatic analyses and contributed to writing the manuscript. TH and SB established some of the scRNA-seq libraries. AJF designed experiments, analyzed data, constructed figures and contributed to writing the manuscript.

**Acknowledgements:** This work was supported by RO1 EY032141- 01 (AJF) and UO1 EY027267-04 (AJF, SB).

## 40 **Abstract**

41           The capacity for retinal regeneration varies greatly across vertebrates species. A  
42 recent comparative epigenetic and transcriptomic investigation of Müller  
43 glial (MG) in the retinas of fish, birds and mice revealed that Fatty Acid Binding Proteins  
44 (FABPs) are among the most highly up-regulated genes in activated chick MG (Hoang  
45 et al., 2020). Herein we provide an in-depth follow-up investigation to describe patterns  
46 of expression and how FABPs and fatty acid synthase (FASN) influence glial cells in the  
47 chick retina. During development, *FABP7* is highly expressed by embryonic retinal  
48 progenitor cells (eRPCs) and maturing MG, whereas *FABP5* is gradually up-regulated in  
49 maturing MG and remains elevated in mature glial cells. *PMP2* (FABP8)  
50 is expressed by oligodendrocytes and *FABP5* is expressed by non-astrocytic inner  
51 retinal glial cells, and both of these FABPs are significantly up-regulated in activated  
52 MG in damaged or growth factor-treated retinas. In addition to suppressing the  
53 formation of MGPCs, we find that FABP-inhibition suppressed the accumulation of  
54 proliferating microglia, although the microglia appeared highly reactive. scRNA-seq  
55 analyses of cells treated with FABP-inhibitor revealed distinct changes in patterns  
56 of expression suggesting that FABPs are involved in the transitions of MG from a  
57 resting state to a reactive state and conversion from reactive MG to MGPCs. Inhibition  
58 of FABPs in undamaged retinas had a significant impact upon the transcriptomic  
59 profiles of MG, with up-regulation of genes associated with gliogenesis, decreases in  
60 genes associated with neurogenesis, and suppression of the ability of MG to become  
61 MGPCs. scRNA-seq analyses of microglia indicated that FABP inhibition enhances  
62 gene modules related to reactivity, proliferation and cytokine signaling. We find that the  
63 proliferation of retinal progenitors in the circumferential marginal zone (CMZ) is  
64 unaffected by FABP-inhibitor. Upstream of FABP activity, we inhibited FASN in  
65 damaged retinas, which reduced numbers of dying cells, increased the proliferation of  
66 microglia, and potently suppressed the formation MGPCs in damaged retinas. We  
67 conclude that the activity of FASN and FABPs are required early during the formation of  
68 proliferating MGPCs. Fatty acid metabolism and cell signaling involving fatty acids are  
69 important in regulating glial homeostasis in the retina, and the dedifferentiation and  
70 proliferation of microglia and MGPCs.

71

## 72 **Introduction**

73           The process of retinal regeneration varies greatly across vertebrate species. In  
74 the fish, retinal neuronal regeneration is a robust process that restores functional cells  
75 and visual acuity following injury, whereas this process is far less robust in birds and  
76 absent in mammals (Hitchcock and Raymond, 1992; Karl et al., 2008; Raymond, 1991).  
77 Müller glia (MG) have been identified as the cell of origin for progenitors in regenerating  
78 retinas (Bernardos et al., 2007; Fausett and Goldman, 2006; Fausett et al., 2008;  
79 Fischer and Reh, 2001; Ooto et al., 2004). In normal healthy retinas, MG are the  
80 predominant type of support cell that provide structural, metabolic, visual cycle, and  
81 synaptic support (Reichenbach and Bringmann, 2013). In response to damage, certain  
82 growth factors or drug treatments, MG can be stimulated to become reactive, de-  
83 differentiate, up-regulate progenitor-related genes, re-enter the cell cycle and produce  
84 progeny that differentiate as neurons (Fischer and Bongini, 2010; Gallina et al., 2014a;  
85 Wan and Goldman, 2016).

86           In mammalian retinas, significant stimulation such as forced expression of *Ascl1*,  
87 inhibition of histone deacetylases and neuronal damage is required to reprogram MG  
88 into progenitor-like cells that produce a few new neurons (Jorstad et al., 2017; Pollak et  
89 al., 2013; Ueki et al., 2015). Alternatively, deletion of *Nfia*, *Nfib* and *Nfix* in mature MG  
90 combined with retinal damage and treatment with insulin+FGF2 results in  
91 reprogramming of MG into cells that resemble inner retinal neurons (Hoang et al.,  
92 2020). Blockade of Hippo-signaling via forced expression of degradation-resistant YAP1  
93 drives the proliferation of mature MG in the mouse retina (Hamon et al., 2019; Rueda et  
94 al., 2019), but it remains unknown whether any of the progeny differentiate as neurons.  
95 In addition, viral delivery of reporters,  $\beta$ -catenin, *Otx2*, *Crx* and *Nrl* may reprogram MG  
96 into photoreceptors (Yao et al., 2018), but there are concerns that the viral vectors and  
97 mini-promoters used in these studies are prone to leaky expression in neurons  
98 (Blackshaw and Sanes, 2021). In the chick retina, MG readily reprogram into progenitor-  
99 like cells that proliferate, but the progeny have a limited capacity to differentiate as  
100 neurons (Fischer and Reh, 2001; Fischer and Reh, 2003). Understanding the  
101 mechanisms that regulate the formation of MGPCs and neuronal differentiation of

102 progeny is important to harnessing the regenerative potential of MG in warm-blooded  
103 vertebrates.

104 Fatty acid synthesis, metabolism and signaling are likely to be key components  
105 of regulating neuronal progenitor cells. Fatty Acid Binding Proteins (FABPs) are  
106 cytosolic lipid-binding proteins, that mediate fatty acid metabolism and cell-signaling,  
107 and have highly conserved primary and tertiary structures across species from  
108 *Drosophila* to humans (Hanhoff et al., 2002; Smathers and Petersen, 2011). FABPs are  
109 known to bind to poly-unsaturated fatty acids (PUFAs) including arachidonic acid and  
110 docosahexaenoic acid and have been shown to regulate signal transduction,  
111 neurotransmission, proliferation, differentiation, and cell migration (Allen et al., 2007;  
112 Dawson and Xia, 2012; Tripathi et al., 2017; Yamashima, 2012). Very little is known  
113 about the cellular mechanisms and patterns of expression of FABPs in the retina. In  
114 mammals, FABP3, 5, and 7 have been identified in the brain, retina, and radial glia with  
115 demonstrated roles in differentiation and cell fate determination (Owada, 2008; Sellner,  
116 1993; Sellner et al., 1995) Ilen et al., 2007; Dawson and Xia, 2012; Tripathi et al., 2017;  
117 Yamashima, 2012). Further evidence indicates that FABPs in the CNS modulate  
118 endocannabinoid, Peroxisome Proliferator-Activated Receptor (PPAR), NF- $\kappa$ B, and  
119 CREB signaling (Bogdan et al., 2018; Peng et al., 2017; Tripathi et al., 2017;  
120 Yamashima, 2012). NF- $\kappa$ B has been implicated as a key signaling “hub” that  
121 suppresses the formation of MGPCs in chicks and mice, but not zebrafish (Hoang et al.,  
122 2020; Palazzo et al., 2020).

123 We have previously reported that *FABP5* and *PMP2* are highly up-regulated in  
124 MG in NMDA-damaged retinas, and that inhibition of FABPs potently suppresses the  
125 formation of proliferating MGPCs (Hoang et al., 2020). However, few details are known  
126 about the mechanisms by which FABPs act to influence the formation of MGPCs,  
127 coordinate with other cell-signaling pathways, influence the reactivity of microglia, and  
128 induce changes in gene expression following FABP-inhibition. Accordingly, this study  
129 investigates how FABPs and Fatty Acid Synthase (FASN) influence reprogramming of  
130 MG into MGPCs and analyze transcriptomic changes downstream of FABP inhibition in  
131 damaged and growth factor-treated retinas in the chick model system.

132

133

134 **Methods and Materials:**

135 *Animals:*

136 The animals approved for use in these experiments was in accordance with the  
137 guidelines established by the National Institutes of Health and IACUC at The Ohio State  
138 University. Newly hatched P0 wildtype leghorn chicks (*Gallus gallus domesticus*) were  
139 obtained from Meyer Hatchery (Polk, Ohio). Post-hatch chicks were maintained in a  
140 regular diurnal cycle of 12 hours light, 12 hours dark (8:00 AM-8:00 PM). Chicks were  
141 housed in stainless-steel brooders at 25°C and received water and Purina™ chick  
142 starter *ad libitum*.

143 Fertilized eggs were obtained from the Michigan State University, Department of  
144 Animal Science. Eggs were incubated at a constant 37.5°C, with a 1hr period at room  
145 temperature with a cool-down period every 24hrs. The eggs were rocked every 45  
146 minutes and held at a constant relative humidity of 45%. Embryos were harvested at  
147 various time points after incubation and staged according to guidelines established by  
148 Hamburger and Hamilton (Hamburger and Hamilton, 1992).

149

150 *Intraocular injections:*

151 Chicks were anesthetized with 2.5% isoflurane mixed with oxygen from a non-  
152 rebreathing vaporizer. The technical procedures for intraocular injections were  
153 performed as previously described (Fischer et al., 1998). With all injection paradigms,  
154 both pharmacological and vehicle treatments were administered to the right and left eye  
155 respectively. Compounds were injected in 20 µl sterile saline with 0.05 mg/ml bovine  
156 serum albumin added as a carrier. Compounds included: NMDA (38.5nmol or 154  
157 µg/dose; Millipore Sigma), FGF2 (250 ng/dose; R&D systems), BMS309403 (Millipore  
158 Sigma), C75 (Millipore Sigma), G28UCM (Millipore Sigma). 5-Ethynyl-2'-deoxyuridine  
159 (EdU, ThermoFischer) was injected into the vitreous chamber to label proliferating cells.  
160 Injection paradigms are included in each figure.

161

162 *Single Cell RNA sequencing of retinas*

163 Retinas were obtained from embryonic and hatched chicks. Retinas were  
164 dissociated in a 0.25% papain solution in Hank's balanced salt solution (HBSS), pH =  
165 7.4, for 30 minutes, and suspensions were frequently triturated. The dissociated cells  
166 were passed through a sterile 70µm filter to remove large particulate debris. Dissociated  
167 cells were assessed for viability (Countess II; Invitrogen) and cell-density diluted to 700  
168 cell/µl. Each single cell cDNA library was prepared for a target of 10,000 cells per  
169 sample. The cell suspension and Chromium Single Cell 3' V2 or V3 reagents (10X  
170 Genomics) were loaded onto chips to capture individual cells with individual gel beads  
171 in emulsion (GEMs) using the 10X Chromium Cell Controller. cDNA and library  
172 amplification and for an optimal signal was 12 and 10 cycles respectively. Sequencing  
173 was conducted on Illumina HiSeq2500 (Genomics Resource Core Facility, John's  
174 Hopkins University), or Novaseq6000 (Novogene) using 150 paired-end reads. Fasta  
175 sequence files were de-multiplexed, aligned, and annotated using the chick ENSEMBL  
176 database (GRCg6a, Ensembl release 94) by using 10X Cell Ranger software. Gene  
177 expression was counted using unique molecular identifier bar codes and gene-cell  
178 matrices were constructed. Using Seurat toolkits Uniform Manifold Approximation and  
179 Projection for Dimension Reduction (UMAP) plots were generated from aggregates of  
180 multiple scRNA-seq libraries (Butler et al., 2018; Satija et al., 2015). Seurat was used to  
181 construct gene lists for differentially expressed genes (DEGs), violin/scatter plots and  
182 dot plots. Significance of difference in violin/scatter plots was determined using a  
183 Wilcoxon Rank Sum test with Bonferroni correction. Monocle was used to construct  
184 unguided pseudotime trajectories and scatter plotters for MG and MGPCs across  
185 pseudotime (Qiu et al., 2017a; Qiu et al., 2017b; Trapnell et al., 2012).  
186 SingleCellSignalR was used to assess potential ligand-receptor interactions between  
187 cells within scRNA-seq datasets (Cabello-Aguilar et al., 2020). Genes that were used to  
188 identify different types of retinal cells included the following: (1) Müller glia: *GLUL*, *VIM*,  
189 *SCL1A3*, *RLBP1*, (2) MGPCs: *PCNA*, *CDK1*, *TOP2A*, *ASCL1*, (3) microglia: *C1QA*,  
190 *C1QB*, *CCL4*, *CSF1R*, *TMEM22*, (4) ganglion cells: *THY1*, *POU4F2*, *RBPM2*, *NEFL*,  
191 *NEFM*, (5) amacrine cells: *GAD67*, *CALB2*, *TFAP2A*, (6) horizontal cells: *PROX1*,  
192 *CALB2*, *NTRK1*, (7) bipolar cells: *VSX1*, *OTX2*, *GRIK1*, *GABRA1*, and (7) cone  
193 photoreceptors: *CALB1*, *GNAT2*, *OPN1LW*, and (8) rod photoreceptors: *RHO*, *NR2E3*,

194 *ARR1*. Gene Ontology (GO) enrichment analysis was performed using ShinyGO V0.65  
195 (<http://bioinformatics.sdstate.edu/go/>). scRNA-seq libraries can be queried at  
196 <https://proteinpaint.stjude.org/F/2019.retina.scRNA.html> or gene-cell matrices  
197 downloaded from GitHub at [https://github.com/fischerlab3140/scRNAseq\\_libraries](https://github.com/fischerlab3140/scRNAseq_libraries)  
198

199 *Fixation, sectioning and immunocytochemistry:*

200 Retinal tissue samples were formaldehyde fixed, sectioned, and labeled via  
201 immunohistochemistry as described previously (Fischer et al., 2006; Ghai et al., 2009).  
202 Antibody dilutions and commercial sources for images used in this study are described  
203 in table 1. Observed labeling was not due to off-target labeling of secondary antibodies  
204 or tissue auto-fluorescence because sections incubated exclusively with secondary  
205 antibodies were devoid of fluorescence. Secondary antibodies utilized include donkey-  
206 anti-goat-Alexa488/568, goat-anti-rabbit-Alexa488/568/647, goat-anti-mouse-  
207 Alexa488/568/647, goat-anti-rat-Alexa488 (Life Technologies) diluted to 1:1000 in PBS  
208 and 0.2% Triton X-100.  
209

210 *Labeling for EdU:*

211 For the detection of nuclei that incorporated EdU, immunolabeled sections were  
212 fixed in 4% formaldehyde in 0.1M PBS pH 7.4 for 5 minutes at room temperature.  
213 Samples were washed for 5 minutes with PBS, permeabilized with 0.5% Triton X-100 in  
214 PBS for 1 minute at room temperature and washed twice for 5 minutes in PBS. Sections  
215 were incubated for 30 minutes at room temperature in a buffer consisting of 100 mM  
216 Tris, 8 mM CuSO<sub>4</sub>, and 100 mM ascorbic acid in dH<sub>2</sub>O. The Alexa Fluor 568 Azide  
217 (Thermo Fisher Scientific) was added to the buffer at a 1:100 dilution.  
218

219 *Terminal deoxynucleotidyl transferase dUTP nick end labeling (TUNEL):*

220 The TUNEL assay was implemented to identify dying cells by imaging  
221 fluorescent labeling of double stranded DNA breaks in nuclei. The *In Situ* Cell Death Kit  
222 (TMR red; Roche Applied Science) was applied to fixed retinal sections as per the  
223 manufacturer's instructions.  
224

225 *Photography, measurements, cell counts and statistics:*

226 Microscopy images of retinal sections were captured with the Leica DM5000B  
227 microscope with epifluorescence and the Leica DC500 digital camera. High resolution  
228 confocal images were obtained with a Leica SP8 available in The Department of  
229 Neuroscience Imaging Facility at The Ohio State University. Representative images are  
230 modified to have enhanced color, brightness, and contrast for improved clarity using  
231 Adobe Photoshop. In EdU proliferation assays, a fixed region of retina was counted and  
232 average numbers of Sox2 and EdU co-labeled cells. The retinal region selected for  
233 investigation was standardized between treatment and control groups to reduce  
234 variability and improve reproducibility.

235 Similar to previous reports (Ghai et al., 2009), immunofluorescence intensity was  
236 quantified by using Image J (NIH). Identical illumination, microscope, and camera  
237 settings were used to obtain images for quantification. Retinal areas were sampled from  
238 digital images. These areas were randomly sampled over the inner nuclear layer (INL).  
239 MS Excel and GraphPad Prism 6 were used for statistical analyses. Measurement for  
240 immunofluorescence in the nuclei of MG/MGPCs were made by from single optical  
241 confocal sections by selecting the total area of pixel values above threshold ( $\geq 70$ ) for  
242 Sox2 or Sox9 immunofluorescence (in the red channel) and copying nuclear labeling  
243 from only MG (in the green channel). Measurements of pS6 immunofluorescence were  
244 made for a fixed, cropped area ( $14,000 \mu\text{m}^2$ ) of INL, OPL and ONL. Measurements  
245 were made for regions containing pixels with intensity values of 70 or greater (0 = black  
246 and 255 = saturated). The total area was calculated for regions with pixel intensities  
247 above threshold. The intensity sum was calculated as the total of pixel values for all  
248 pixels within threshold regions.

249 For statistical evaluation of differences in treatments, a two-tailed paired *t*-test  
250 was applied for intra-individual variability where each biological sample also served as  
251 its own control. For two treatment groups comparing inter-individual variability, a two-  
252 tailed unpaired *t*-test was applied. For multivariate analysis, an ANOVA with the  
253 associated Tukey Test was used to evaluate any significant differences between  
254 multiple groups.

255



256 **Results:**

257 **Expression of *FABPs* during embryonic retinal development:**

258 scRNA-seq libraries were established for retinal cells at embryonic day 5 (E5),  
259 E8, E12, and E15. These libraries yielded 22,698 cells after filtering to exclude doublets,  
260 cells with low UMI/genes per cell, and high mitochondrial gene-content. UMAP plots of  
261 aggregate libraries formed clusters of retinal cells that correlated to developmental  
262 stage and cell type (Fig. 1a). Types of cells were identified based on expression of well-  
263 established markers. Retinal progenitor cells (RPCs) from E5 and E8 retinas were  
264 identified by expression of *ASCL1*, *CDK1*, and *TOP2A*. (Fig. 1b). Maturing MG were  
265 identified by expression of *GLUL*, *RLBP1* and *SLC1A3* (Fig. 1b). *FABP5* and *FABP7*  
266 were expressed by different types of developing retinal cells at different stages of  
267 development, whereas *PMP2* (*FABP8*) was not widely expressed by embryonic retinal  
268 cells (Fig. 1c). *FABP5* was predominantly expressed by maturing bipolar and amacrine  
269 cells (Figs. 1c,d). By comparison, *FABP7* was predominantly expressed by early retinal  
270 progenitor cells (eRPCs) from E5 and E8 retinas and at elevated levels in immature MG  
271 at E8, whereas levels decreased in maturing MG at E12 and E15 (Figs.1c,d,f). *FABP7*  
272 was also expressed by maturing bipolar and amacrine cells from E8 retinas (Figs. 1c,d).

273 To further assess patterns of expression we re-embedding of eRPCs and MG to  
274 order cells across pseudotime in an unsupervised manner. Pseudotime-ordering  
275 revealed a continuum of cells with early eRPCs and maturing MG at opposite ends of  
276 the trajectory (Fig. 1e). Across pseudotime levels of *GLUL* increased, while levels of  
277 *CDK1* decreased (Fig. 1e,f). Like *GLUL*, the expression of *FABP5* increases from retinal  
278 progenitors to maturing MG (Fig. 1e-g). By contrast, levels of *FABP7* were relatively  
279 high in eRPCs, increased in differentiating immature MG, and decreased in MG during  
280 later stages of development (Figs. 1e-g). Immunolabeling for *PMP2* confirmed findings  
281 from scRNA-seq. *PMP2* was not expressed in the developing retina until E16, when  
282 *PMP2*-immunofluorescence was detected near the vitread surface of the retina in cells  
283 that resembled oligodendrocytes (Fig. 1h). These findings indicate that *FABP5* and  
284 *FABP7* are dynamically and highly expressed in eRPCs and MG through the course of  
285 embryonic development.

286

## 287 **Expression of FABPs in damage to the chick retina:**

288 We sought to provide a detailed description of patterns of expression of FABPs in  
289 the retinas of normal and hatched chick by using scRNA-seq. Libraries were aggregated  
290 for retinal cells obtained from control and NMDA-damaged retinas at different time  
291 points (24, 48 and 72 hrs) after treatment for a total of 57,230 cells (Fig. 2a). We have  
292 previously used these chick scRNA-seq databases to compare MG and MGPCs across  
293 fish, chick and mouse model systems (Hoang et al., 2020) and characterize expression  
294 patterns of genes related to NFkB-signaling (Palazzo et al., 2020), midkine-signaling  
295 (Campbell et al., 2021), matrix metalloproteases (Campbell et al., 2019), and  
296 endocannabinoid-signaling (Campbell et al., 2021b). UMAP-clustered cells were  
297 identified based on well-established patterns of expression (Fig. 2a,b). Resting MG  
298 formed a discrete cluster of cells and expressed high levels of *GLUL*, *RLBP1* and  
299 *SLC1A3* (Fig. 2a,b). After damage, MG down-regulate markers of mature glia as they  
300 transition into reactive glial cells and into progenitor-like cells that up-regulate *TOP2A*,  
301 *CDK1* and *ESPL1* (Fig. 2a,b). *FABP5* and *PMP2* were expressed at low levels in  
302 relatively few resting MG in undamaged retina, whereas *FABP7* was widely expressed  
303 by the majority of resting MG (Fig. 2c,d). *FABP7* and *PMP2* were detected in  
304 oligodendrocytes and Non-astrocytic Inner Retinal Glia (NIRGs). NIRG cells are a  
305 distinct type of glial cell that has been described in the retinas of birds (Rompani and  
306 Cepko 2010; Fischer et al., 2010) and some types of reptiles (Todd et al., 2016b).  
307 Following NMDA-induced retinal damage, levels of *FABP5*, *FABP7* and *PMP2* were  
308 significantly increased in activated MG at 24 hrs (Fig. 2c,d). Levels of *FABP5* and *PMP2*  
309 were significantly reduced in activated MG at 48hrs and 72hrs, but remained elevated in  
310 proliferating MGPCs (Fig. 2c,d).

311 We re-ordered MG along pseudotime trajectories to better assess changes in  
312 expression of *FABPs* during the transition of MG to progenitor cells. We identified 5  
313 pseudotime states and a trajectory that included distinct branches for resting Müller glia  
314 (state 1), activated Müller glia (state 5), transitional Müller glia (states 2,3), and MGPCs  
315 (state 4) (Fig. 2e). Dimensional reduction to a single pseudotime axis placed resting  
316 Müller glia (high levels of *GLUL*) to the left and highly activated MG and MGPCs (high  
317 levels of *CDK1*) the far right of the pseudotime axis (Fig. 2e-f). The expression of

318 *FABP5* and *PMP2* across pseudotime positively correlated with a transition toward an  
319 MGPC-phenotype, and inversely correlated to resting glial phenotypes (Fig. 2f,g).  
320 Levels of *FABP7* were not significantly different across most pseudotime states, with the  
321 exception of elevated levels in state 4 which is occupied by MGPCs, compared to levels  
322 in resting and activated MG (Fig. 2f,g).

323 We next assessed patterns of expression of FABPs in scRNA-seq libraries from  
324 time-points soon after NMDA at 3 and 12 hrs after treatment. These libraries were  
325 generated with newer, more sensitive reagents and did not integrate well with older  
326 libraries generated with less sensitive reagents. UMAP ordering of MG revealed distinct  
327 clusters of cells which closely match treatment groups and included resting MG, early  
328 activated MG, 3 groups of activated MG and 2 groups of MGPCs (supplemental Fig.  
329 1a,b). Levels of *FABP5* were reduced, but expressed by a larger percentage of MG at  
330 3hrs after NMDA, levels increased in activated MG, and further increased in MGPCs  
331 (supplemental Fig. 1e,h). *FABP7* was down-regulated in MG at 12hrs, but increased in  
332 MGPCs at 48hrs after NMDA (supplemental Fig. 1f,h). Levels of *PMP2* were not  
333 increased in MG until 12hrs after NMDA-treatment, and remained elevated in MGPCs  
334 through 48hrs after treatment (supplemental Fig. 1g,h).

335

### 336 **Immunolabeling for PMP2**

337 We next sought to characterize PMP2 immunolabeling in normal retinas. We  
338 found that PMP2 immunofluorescence was observed in NIRG cells, but only in  
339 peripheral regions of retina (Fig. 3a). Although the NIRG cells were often observed in  
340 the proximal INL and had morphologies reminiscent of amacrine cells; these cells were  
341 negative for amacrine cell markers including AP2 $\alpha$ , Islet1 and tyrosine hydroxylase (Fig.  
342 3a). PMP2-immunolabeling was prevalent in oligodendrocytes extended processes into  
343 the NFL, and were negative for Glutamine Synthase (GS; Fig. 3b). The PMP2-positive  
344 oligodendrocytes were immunoreactive for Olig2 (Fig. 3c), Sox10 (Fig. 3g) and HuC/D  
345 (Fig. 3d). HuC/D is thought to be a neuron-specific marker, but appears to be up-  
346 regulated in PMP2+ oligodendrocytes after NMDA-treatment (Fig. 3d) and a few of  
347 these cells proliferate (accumulate EdU) in central and peripheral regions of the  
348 damaged retinas (Fig. 3e,f). NIRG cells were not immunoreactive for HuC/D at any time

349 after NMDA-treatment. Further, we failed to observe PMP2 in NIRG cells  
350 (Sox2+/Nkx2.2+ cells in the IPL) in central regions of control or NMDA-damaged retinas  
351 (Fig. 3h,i). Collectively, these patterns of immunolabeling are consistent with scRNA-  
352 seq data for oligodendrocytes and NIRG cells and patterns of expression for *PMP2*,  
353 *SOX10*, *OILG2* and *ELAVL4* (HuD; Fig. 3j). Further, NIRG cells expressed *FABP5* and  
354 *FABP7*, whereas oligodendrocytes expressed *PMP2* (Fig. 3j).

355

### 356 **FABPs in eRPC, MGPCs and CMZ progenitors**

357 We next sought to directly compare levels of FABPs between different types of  
358 retinal progenitor cells. We aggregated progenitors from E5 and E8 retinas, and MGPCs  
359 from retinas treated with NMDA and/or insulin and FGF2 (Fig. 4a). UMAP-ordering of  
360 cells revealed 2 distinct clusters of cells for eRPCs and MGPCs (Fig. 4b), with both  
361 clusters expressing high levels of proliferation-associated genes including *PCNA*,  
362 *SPC25*, *TOP2A* and *CDK1* (Fig. 4b,c). MGPCs express high levels of *FABP5* and  
363 *PMP2* with significantly higher levels in MGPCs from retinas treated with insulin and  
364 FGF2, whereas eRPCs did not express *FABP5* or *PMP2* (Fig. 4c-f). By contrast, levels  
365 of *FABP7* were higher in proliferating eRPCs than in proliferating MGPCs with  
366 significantly lower levels in MGPCs from retinas treated with insulin and FGF2 (Fig. 4f).

367 We next examined whether retinal progenitors in the circumferential marginal  
368 zone (CMZ) expressed PMP2. Proliferating retinal progenitors with limited neurogenic  
369 potential are known to reside in a CMZ in the post-hatch chick eye (Fischer and Reh,  
370 2000). Since our scRNA-seq databases did not include CMZ progenitors at the far  
371 peripheral edge of the retina, we immunolabeled sections of CMZ with antibodies to  
372 PMP2. PMP2-immunolabeling was present at relatively low levels in MG and CMZ  
373 progenitors at the far peripheral edge of the retina (Fig. 4h). Levels of PMP2-  
374 immunoreactivity appeared elevated in MG and CMZ progenitors in retinas treated with  
375 insulin and FGF2 (Fig. 4h). Although, the proliferation of CMZ progenitors was  
376 increased by injections of insulin and FGF2, the proliferation of CMZ progenitors was  
377 unaffected by FABP inhibitor (Fig. 4i-k).

378

379

## 380 **FABPs in retinas treated with insulin and FGF2**

381 We next examined FABP expression in MG and MGPCs in the absence of  
382 neuronal damage. In the chick retina the formation of proliferating MGPCs can be  
383 induced by consecutive daily injections of Fibroblast growth factor 2 (FGF2) and insulin  
384 in the absence of neuronal damage (Fischer et al., 2002; Fischer et al., 2009b; Fischer  
385 et al., 2014b; Ritchey et al., 2012). Eyes were treated with two or three consecutive  
386 daily doses of FGF2 and insulin, and retinas were processed to generate scRNA-seq  
387 libraries. UMAP ordering of cells revealed distinct clusters that were segregated based  
388 on cell type (Fig. 5a). MG glia were identified based on the expression of *VIM*, *GLUL*  
389 and *SLC1A3*, and MGPCs were identified based on expression of *TOP2A*, *NESTIN*,  
390 *CCNB2* and *CDK1* (Fig. 5b). Resting MG from saline-treated retinas formed a cluster of  
391 cells distinct from MG from retinas treated with either two or three doses of  
392 FGF2+insulin (Fig. 5b). Additionally, MG treated with 2 versus 3 doses of insulin and  
393 FGF2 were sufficiently dissimilar to follow different pseudotime trajectories, with MGPCs  
394 from retinas treated with 3 doses of insulin+FGF2 occupying a distinct branch (Fig. 5e).  
395 Similar to patterns of expression seen in NMDA-damaged retinas, *FABP5*, *FABP7* and  
396 *PMP2* were significantly increased in MG treated with insulin and FGF2 (Fig. 5d).  
397 Reduction of pseudotime trajectories to one axis revealed increases in levels of *FABP5*  
398 and *PMP2* across pseudotime that paralleled increasing numbers of proliferating  
399 MGPCs that expressed *CDK1*, whereas levels of *FABP7* were relatively unchanged  
400 across pseudotime (Fig. 5f).

401 We next compared levels of FABPs in MG and MGPCs in retinas treated with  
402 insulin+FGF2 ± NMDA. We probed a large aggregate scRNA-seq library of more than  
403 55,000 cells wherein UMAP ordering revealed discrete clustering of resting MG,  
404 activated MG and MGPCs (supplemental Fig. 2a). Levels of *FABP5* and *PMP2* were  
405 lowest in resting MG, and highest in activated MG at 24hrs after NMDA and MGPCs  
406 compared to the elevated levels seen in MG treated with insulin+FGF2,  
407 NMDA+insulin+FGF2 and activated MG at 48+72 hrs after NMDA (supplemental Fig. 2f-  
408 h). Patterns of expression for *FABP7* were similar to those seen for *FABP5* and *PMP2*,  
409 although higher levels of expression were observed in both reactive and, in particular,  
410 resting MG (supplemental Fig. 2f-h). By comparison, levels of *FASN* were highest in

411 resting MG, lowest in MGPCs, and at intermediate levels in activated MG observed  
412 following injury or growth factor treatment (supplemental Fig. 2f-h).

413 To test whether PMP2 was increased when MG were treated with FGF2 we  
414 immunolabeled retinal sections. We found that PMP2-immunoreactivity was increased  
415 in FGF2-treated MG (Fig. 6a). This effect was not evident in central regions of the  
416 retina, but was apparent in peripheral regions (Fig. 6a). Some of the PMP2+/Sox2+ MG  
417 were labeled for EdU (Fig. 6b), indicating that these cells were proliferating MGPCs. We  
418 next investigated whether FABP-inhibition influenced the formation of MGPCs in the  
419 absence of neuronal damage. We have reported previously that proliferating MGPCs  
420 are formed in peripheral regions of retinas treated with consecutive daily injections of  
421 FGF2 alone (Fischer et al., 2014). Accordingly, we applied BMS309403 with FGF2 and  
422 probed for the formation of proliferating MGPCs. Inhibition of FABPs significantly  
423 reduced numbers of Sox2/EdU-labeled cells in the INL of FGF2-treated retinas (Fig.  
424 6c,d).

425

### 426 **Genes regulated by FABP-inhibition**

427 To identify transcriptional changes downstream of FABP inhibition we generated  
428 scRNA-seq libraries for control retinas and retinas treated with inhibitor (BMS309403) ±  
429 NMDA. Aggregation of the scRNA-seq libraries revealed distinct UMAP clusters of  
430 retinal neurons and glia (Fig. 7a,b). UMAP-ordering did not result in distinct clustering of  
431 neurons based on treatment, whereas MG were clustered according to treatments (Fig.  
432 7a,b). Genes upregulated in activated MG included *HBEGF*, *TUBB6* and *TGFB2* (Fig.  
433 7d). MGPCs upregulated genes such as *CDK1*, *TOP2A* and *ESPL1* (Fig. 7e). Resting  
434 MG expressed high levels of *GLUL*, *RLBP1* and *SLC13A* which were downregulated in  
435 activated MG (Fig. 7f). We identified differentially expressed genes (DEGs) in MG from  
436 retinas treated with BMS, NMDA and BMS+NMDA (Fig. 7c; supplemental tables 1,2,3).  
437 BMS treatment of undamaged retinas resulted in significant changes in gene  
438 expression, which included down-regulation of 393 genes including markers for resting  
439 mature glia such as *GLUL*, *CRABP-I*, *RLBP1*, *CA2*, *SFRP1* and *ID4* (Fig. 7g,  
440 supplemental table 1). By comparison, BMS-treatment resulted in an up-regulation of  
441 495 genes including FABPs, secreted factors associated with glial activation and

442 receptors for TNF-related ligands (Fig. 7g, supplemental table 1). Gene ontology (GO)  
443 enrichment analysis of DEGs from saline-BMS-treated MG revealed significant  
444 enrichment for up-regulated genes associated with gliogenesis, wound healing and  
445 developmental processes (Fig. 7i), whereas down-regulated genes were associated  
446 with neurogenesis and cell proliferation (Fig. 7i). BMS-treatment of NMDA-damaged  
447 retinas resulted in significant changes in gene expression which included down-  
448 regulation of 192 genes including markers for proliferation, pro-glia genes *NFIX* and  
449 *ID4*, and High Mobility Group (HMG) genes (Fig. 7h, supplemental table 2). By  
450 comparison, BMS-treatment resulted in an up-regulation of 114 genes including *FABP5*  
451 and *FABP7*, secreted factors *BMP4*, *WNT4* and *WNT6*, and glial reactivity genes such  
452 as *CD44* (Fig. 7h, supplemental table 2). GO enrichment analysis of down-regulated  
453 genes from NMDA/BMS-treated MG revealed significant enrichment for genes  
454 associated with proliferation and organelle fission (Fig. 7i). By comparison, GO  
455 enrichment analysis for upregulated genes from NMDA/BMS-treated MG revealed  
456 significant enrichment for genes associated with growth factor signaling, cell death and  
457 cell motility (Fig. 7j).

458 We isolated MG from 4 treatment groups and re-ordered these cells in UMAP  
459 plots. The MG formed 5 distinct clusters; 2 clusters of resting MG (occupied  
460 predominantly by cells from retinas treated with saline- and BMS-saline), 2 clusters of  
461 activated glia (occupied predominantly cells from retinas treated with NMDA, BMS-  
462 NMDA and BMS-saline), and MGPCs (occupied predominantly by cells from retinas  
463 treated with NMDA alone) (supplemental Fig. 2a-c). This finding suggest that BMS-  
464 treatment induces MG to acquire a reactive phenotype. Markers for mature resting MG  
465 were significantly down-regulated in activated MG and MGPCs; these markers included  
466 *GLUL*, *RLBP1*, *CSPG5* and *ID4* (supplemental Fig. 2d-h). By contrast, activated MG  
467 significantly up-regulated markers associated with reactivity such as *HBEGF*, *TGFB2*,  
468 *BMP4*, *S100A*, *SDC4*, *CD44*, *FABP5*, *FABP7* and *PMP2* (supplemental Fig. 2d-h). Not  
469 surprising, MGPCs had elevated levels of proliferation markers such as *CDK1*, *TOP2A*  
470 and *SPC25* (supplemental Fig. 2d-h). GO enrichment analysis for DEGs between  
471 resting MG and activated MG revealed significant enrichment for up-regulated genes  
472 associated with cell metabolism, structural cytoskeleton, and organelle organization

473 (supplemental Fig. 2j). By comparison there was significant enrichment for down-  
474 regulated genes associated with transcriptional regulation, cell adhesion, cellular  
475 projections, and neuronal development (supplemental Fig. 2j). GO enrichment analysis  
476 for DEGs between activated MG and MGPCs revealed significant enrichment for up-  
477 regulated genes associated with cell division, and enrichment for down-regulated genes  
478 associated with nervous system development and neuronal differentiation  
479 (supplemental Fig. 2i).

480 We next isolated the MG, microglia and NIRG cells, re-embedded these cells in  
481 UMAP plots and probed for cell signaling networks and putative ligand-receptor  
482 interactions using SingleCellSignalR (Cabello-Aguilar et al., 2020). We chose to focus  
483 our analyses on the MG, microglia and NIRG cells because there is significant evidence  
484 to indicate autocrine and paracrine signaling among MG, microglia and NIRG cells in  
485 the context of glial reactivity and the formation of proliferating MGPCs (Fischer et al.,  
486 2014b; Wan et al., 2012; White et al., 2017; Zelinka et al., 2012a). Resting MG included  
487 cells for saline and BMS-treatment groups, activated MG included cells mostly from  
488 BMS-saline, NMDA and BMS-NMDA treatment groups, and MGPCs were  
489 predominantly derived the NMDA-treatment group (Fig. 8a-c). Numbers of LR-  
490 interactions (significant upregulation of putative ligand and receptor) between cell types  
491 in the different treatment groups varied between 70 and 315 (Fig. 8d-g). We performed  
492 analyses on glial cells from each treatment group and compared changes across the  
493 most significant LR-interactions. For example, LR-interactions included *IGF1R* and  
494 *FGFR1* in activated MG to MGPCs, but not when treated with BMS (Fig. 8f,g). By  
495 comparison, BMS-treated MG included LR-interactions with *TGFBR2* and interactions  
496 involving *TNFRSF11B*, *MDK*, *PTN* and *PTPRZ1* (Fig. 8f,g). We compared significant  
497 changes in LR-interactions among glial cells and interactions unique to treatment  
498 groups for undamaged and damaged retinas. We identified 33 LR-interactions specific  
499 to saline-treated glia and 148 LR-interactions specific to BMS-treated glia in undamaged  
500 retinas (Fig. 8h,i,l,m,p). Glia in undamaged saline-treated retinas included LR-  
501 interactions for *FGF9-FGFR3/4*, *BMP2-ACVR2* and *BMP6-BMP2R* (Fig. 8h,i,l,m,p). By  
502 comparison, glia in undamaged BMS-treated retinas included LR-interactions  
503 associated with activated glial phenotypes such as *IL1B-IL1RAP*, *TGFB1/2-TGFBR2*,



504 *HBEGF-CD9/CD82/ERBB2/EGFR*, and *JAG1/JAG2/PSEN1-NOTCH2* (Fig. 8h,i,l,m,p  
505 p). We identified 40 LR-interactions specific to saline/NMDA-treated glia and 86 LR-  
506 interactions specific to BMS/NMDA-treated glia in damaged retinas (Fig. 8j,k,n,o,q). LR-  
507 interactions unique to glia in NMDA-damaged retinas included *BMP-*, *MDK-*, *FGF-* and  
508 *DLL1-Notch1*-signaling (Fig. 8j,k,n,o,q). By comparison, LR-interactions unique to  
509 BMS/NMDA-damaged retinas included *JAG1/2/PSEN1-Notch2*, *INHBA-ACVR2*,  
510 *TGFB1-ITGB3* and *WNT5A-LRP2/FZD4* (Fig. 8 j,k,n,o,q).

511

### 512 **Inhibition of FABPs in resting MG**

513 We next sought to investigate and validate changes in cell signaling in damaged  
514 retinas treated with FABP-inhibitor. One day after treatment with NMDA ± BMS there  
515 was a significant increase in numbers of dying TUNEL+ cells (Fig. 9a,b). By contrast,  
516 we observed a significant decrease in pS6 in MG in damaged retinas treated with BMS  
517 (Fig. 9a,b), consistent with findings from SingleCellSignalR where LR-interactions for  
518 *FGF1-FGFR1* and *MDK-ITGA4* are missing with BMS-treatment (Fig. 8q). MDK and  
519 FGF are known to active mTor-signaling and up-regulated pS6 in MG in the chick retina  
520 (Campbell et al., 2021a; Zelinka et al., 2016). Consistent with these findings, we  
521 observed reduced levels of pStat3 in MG nuclei in damaged retinas treated with BMS  
522 (Fig. 9a,b). Stat phosphorylation is known to be down-stream of PDGF-signaling (Li et  
523 al., 2012; Popielarczyk et al., 2019) and PDGFA-PDGFR LR-interactions are missing  
524 from damaged retinas treated with BMS (Fig. 8q). Similarly, we find reduced levels of  
525 pSMAD1/5/8 in MG nuclei in damaged retinas treated with BMS (Fig. 9a,b). This may  
526 result from increased signaling through ACVR2A and TGFB1/ITGB3 which may  
527 antagonize BMP/SMAD-signaling (Todd et al., 2017).

528 scRNA-seq data indicated that BMS-treatment of undamaged retina had a  
529 significant impact on the transcriptional profile of MG with profiles resembling de-  
530 differentiation and reactive glia. We sought to verify some of the scRNA-seq data by  
531 labeling BMS-treated retinas with antibodies to vimentin or PMP2. We found that BMS-  
532 treatment significantly increase immunofluorescence for vimentin and PMP2 in MG (Fig.  
533 9c,d). Since, BMS treatment appeared to stimulate MG to become reactive and de-  
534 differentiate processes that occur during a transition to a progenitor-like phenotype

535 (Hoang et al., 2020), we tested whether BMS treatment primes MG to become  
536 proliferating progenitors in damaged retinas. BMS treatment should have primarily  
537 inhibited FABP7 in resting MG and this inhibition was predicted to enhance the ability of  
538 MG to become proliferating MGPCs. Contrary to expectations, we found that BMS  
539 treatment of retinas before NMDA-induced damage suppressed the formation of  
540 proliferating MGPCs (Fig. 9e,f). The proliferation of NIRG cells was not affected by BMS  
541 treatment prior to NMDA-induced retinal damage (not shown).

542

### 543 **Effects of FABP-inhibition in microglia**

544 Retinal microglia and infiltrating macrophage are known to promote the formation  
545 of MGPCs in chick and zebrafish retinas (Fischer et al., 2014b; Palazzo et al., 2020;  
546 White et al., 2017) and suppress the neuronal differentiation of reprogrammed MG in  
547 mouse retinas (Todd et al., 2020). Accordingly, we investigated whether microglia were  
548 influenced by treatment with FABP inhibitor. The application of BMS to NMDA-damaged  
549 retinas suppressed the accumulation of microglia and significantly reduced numbers of  
550 EdU+/CD45+ cells (Fig. 10a,b). The microglia in BMS-NMDA treated retinas appeared  
551 to retain a reactive morphology (Fig. 10a). Thus, it is possible that reduced numbers of  
552 proliferating MGPCs resulted, in part, from reduced accumulation of reactive monocytes  
553 in BMS-treated retinas.

554 We isolated and UMAP-embedded microglia from retinas treated with saline,  
555 BMS and NMDA. UMAP plots revealed distinct clusters of resting microglia, activated  
556 and proliferating cells (Fig. 10c). The resting microglia UMAP clusters were  
557 predominantly occupied by microglia from saline-treated retinas, whereas microglia from  
558 BMS-saline treated retinas were clustered among activated cells (Fig. 10c,d). BMS-  
559 treatment of microglia in undamaged retinas resulted in up-regulation of 545 genes,  
560 whereas no genes were significantly down-regulated (Fig. 10e,g; supplemental table 4).  
561 BMS-treatment in undamaged retinas stimulated microglia to up-regulate genes  
562 associate with proliferation, cell signaling, complement, integrins and glial transcription  
563 factors (Fig. 10e; supplemental table 4). NMDA-treatment stimulated microglia to  
564 significantly up-regulate nearly 1400 genes including *FABP5*, *FABP7*, *PMP2* and *FASN*,  
565 whereas only 8 genes were down-regulated (Fig. 10g,f; supplemental table 5). BMS-

566 treatment of NMDA-damaged retinas resulting if changes in expression of only 6 genes,  
567 and *PMP2* was among the few genes upregulated by microglia in BMS/NMDA-damaged  
568 retinas (Fig. 10f). GO enrichment analysis of DEGs in microglia from retinas treated with  
569 saline  $\pm$  BMS indicated groups of genes associated with cellular biogenesis, regulation  
570 of cell death and hydrolytic/catabolic processes (Fig. 10h). Thus, it is not surprising that  
571 the BMS-treated microglia were embedded among microglia from NMDA-damaged  
572 retinas in UMAP plots (Fig. 10c,d). GO enrichment analysis of DEGs in microglia from  
573 retinas treated with saline  $\pm$  NMDA indicated groups of genes associated with lytic  
574 enzyme activity, lysosomal activity and cellular biogenesis (Fig. 10j). There were only 6  
575 DEGs in microglia from retinas treated with NMDA  $\pm$  BMS, consistent with the co-  
576 clustering of microglia from these treatments in UMAP plots (Fig. 10d). These microglia  
577 were harvested at 48hrs after NMDA-treatment and, thus, it is likely that significant  
578 differences in gene expression that led to decreased accumulation of reactive microglia  
579 in BMS/NMDA-treated retinas occurred shortly after damage and BMS-treatment. This  
580 is consistent with scRNA-seq findings in NMDA-damaged mouse retinas wherein  
581 microglia significantly up-regulated genes for pro-inflammatory cytokines between 3 and  
582 12 hrs after damage (Todd et al., 2019).

583

### 584 **FASN influences MGPCs, neuronal survival and the accumulation of reactive** 585 **microglia**

586 Fatty acid synthase (FASN) –dependent fatty acid synthesis is necessary for  
587 FABP activity. scRNA-seq data indicated that FASN is widely expressed by most retinal  
588 cell types (Fig. 11a). In MG, levels of FASN were elevated in resting MG and down-  
589 regulated in MG at 24, 48 and 72 hrs after NMDA treatment, and remained low and  
590 prevalent in MGPCs (Fig. 11a,b). Relative levels of FASN in MG and MGPCs across  
591 different treatments were highest in resting MG, lowest in MGPCs and intermediate  
592 levels in activated MG at different times after NMDA and doses of insulin + FGF2  
593 (supplemental Fig. 2f-h). We further assessed patterns of expression of FASN in  
594 aggregate libraries from time-points soon after NMDA, at 3 and 12 hrs after treatment.  
595 Levels of *FASN* were significantly up-regulated in MG at 3hrs after NMDA and back

596 down at 12 and 48 hrs after NMDA (Fig. 11c,d), suggesting a rapid and transient need  
597 for elevated fatty acid synthesis in MG shortly after NMDA-treatment.

598 Treatment of NMDA-damaged retinas with FASN inhibitors, G28UCM and C75,  
599 resulted in significant reductions in numbers of proliferating MGPCs (Fig. 11e-g). These  
600 large decreases in numbers of proliferating MGPCs occurred despite significant  
601 decreases in cell death (Fig. 11h-j) and increases in proliferation of microglia (Fig. 11k-  
602 p) in NMDA-damaged retinas treated with FASN inhibitors. Increases in numbers of  
603 proliferating microglia occurred without increasing total numbers of CD45+ cells (Fig.  
604 11k,p), suggesting that there was less recruitment of peripheral monocytes coincident  
605 with increased proliferation of resident microglia to result in no net change in total  
606 numbers of CD45+ cells in the retina. NIRG cells were not significantly affected by  
607 FASN inhibitors (not shown).

608 We next sought to investigate whether cell signaling in damaged retinas was  
609 influenced by FASN-inhibitor. We observed a significant decrease in levels of pS6 in the  
610 cytoplasm of MG treated with FASN-inhibitor in damaged retinas (Fig. 12a,b). By  
611 comparison, levels of pStat3 and pSmad1/5/8 were undetectable in the nuclei of MG  
612 treated with FASN-inhibitor in damaged retinas ( $n \geq 5$ ) (Fig.12a). Signaling through mTor  
613 (pS6), Jak/Stat- and BMP/SMAD-signaling are known to be required for the formation of  
614 proliferating MGPCs (Todd et al., 2016a; Todd et al., 2017; Zelinka et al., 2016).  
615 Inhibition of FASN in NMDA-damaged retinas had no effect upon numbers of TUNEL-  
616 positive dying cells (Fig. 12a,d).

617

## 618 **Discussion:**

619 In this study we investigate the function of FASN and FABPs in glial cells in the  
620 chick retina. We observed that *FABP7* is highly expressed by eRPCs and maturing MG  
621 during embryonic development. *FABP7*, *FABP5* and *PMP2* are up-regulated during the  
622 activation of MG after damage or treatment with FGF2 and insulin. This pattern of FABP  
623 expression was also observed for NIRG cells and microglia in damaged retinas.  
624 Inhibition of FABPs or FASN influenced the proliferation of different types of cells  
625 including NIRG cells, microglia, and MGPCs. Inhibition of FABPs in undamaged retinas  
626 induced reactivity in MG, but also both decreased levels of genes associated with

627 resting mature MG and neurogenesis and increased genes associated with gliogenesis  
628 and inflammation. Inhibition of FABPs and FASN in damaged retinas selectively  
629 suppressed cell signaling pathways in MG that are known to promote the formation of  
630 MGPCs. These findings indicate the importance of FASN and FABPs in mediating the  
631 transition into a proliferating MGPCs.

632

### 633 ***FABPs in retinal development***

634 Different FABP isoforms are known to be expressed by different cell types in  
635 maturing mammalian brain (Owada, 2008). Similarly, FABP isoforms have been  
636 identified in the chick retina (Sellner, 1993). FABP7 is often used as a biomarker for  
637 radial glia (brain lipid binding protein, Blbp) in the developing mouse brain and is  
638 presumed to facilitate cortical development (Anthony et al., 2005; Feng et al., 1994).  
639 FABPs are expressed in different types of tumors, particularly in cancer metastasis  
640 (Ohmachi et al., 2006; Senga et al., 2018). We found that *FABP7* was upregulated in  
641 developing and maturing MG in embryonic chick retina. In addition, *FABP7* was  
642 detected in developing amacrine and bipolar interneurons, but was downregulated in  
643 mature neurons. By comparison, *FABP5* was expressed at high levels in mature  
644 interneurons. These cell-type specific patterns of expression for FABPs may indicate  
645 isoform-specific roles despite overlap in ligand-binding among FABPs.

646 The chick eye is known to have proliferating retinal progenitor cells at the ciliary  
647 marginal zone of the retina (Fischer and Reh, 2000; Fischer et al., 2014a). Inhibition of  
648 FABPs did not influence the proliferation of CMZ progenitors. These progenitors  
649 expressed relatively low levels of PMP2, but expression of FABP5 and FABP7 in these  
650 cells remains unknown. Treatment with insulin and FGF2 upregulated PMP2 in MG and  
651 CMZ progenitors, yet FABP inhibitor did not influence the proliferation of the CMZ  
652 progenitors. It is possible that FABP inhibitor had no effect because the drug failed to  
653 diffuse through the vitreous to act at the CMZ. Alternatively, FABPs do influence the  
654 proliferation of CMZ progenitors. Although many cell signaling pathways can influence  
655 both CMZ progenitors and MGPCs, there are instances where CMZ progenitors and  
656 MGPCs are differentially influenced by cell signaling pathways. For example, insulin and  
657 IGF1 stimulate the proliferation of CMZ progenitors (Fischer and Reh, 2000; Fischer

658 and Reh, 2002), whereas the insulin and IGF1 must be combined with FGF2 to  
659 stimulate the proliferation of MGPCs (Fischer et al., 2002; Ritchey et al., 2012).  
660 Similarly, HG-EGF stimulates the proliferation of MGPCs, but has no effect upon CMZ  
661 progenitors even when combined with IGF1 (Todd et al., 2015). By comparison,  
662 glucagon suppresses the proliferation of CMZ progenitors (Fischer et al., 2005),  
663 whereas glucagon has no effect upon the proliferation of MGPCs (unpublished  
664 observations). By contrast, the proliferation of CMZ progenitors and MGPCs can be  
665 stimulated by Sonic Hedgehog signaling (Moshiri et al., 2005; Todd and Fischer, 2015),  
666 stimulated by retinoic acid (Todd et al., 2018) and by inhibition of Smad3 (Todd et al.,  
667 2017).

668

### 669 ***NIRG and Oligodendrocyte proliferate after damage***

670 During embryonic development glial precursor cells migrate into the retina from  
671 the optic nerve (Rompani and Cepko, 2010). These precursor cells undergo a cell  
672 division to generate oligodendrocytes and diacytes (Rompani and Cepko, 2010), also  
673 known as non-astrocytic inner retinal glia (NIRG) cell that reside predominantly in the  
674 IPL (Fischer et al., 2010). This unique type of glial cell has been identified in the retinas  
675 of birds and some types of reptiles (Todd et al., 2016b). The functions of the NIRG cells  
676 is unknown, but these cells are known to proliferate in response to IGF1 (Fischer et al.,  
677 2010) and their survival is tethered to retinal microglia (Zelinka et al., 2012b). We find  
678 that NIRG cells express PMP2, but only in peripheral regions of the retina or at later  
679 times (>7 days) after NMDA-induced damage. By comparison, inhibition of FASN had  
680 no effect upon the proliferation of NIRG cells.

681 Consistent with previous reports (Kohsaka et al., 1980; Kohsaka et al., 1983), the  
682 chicken retina contains axons that are thinly myelinated by oligodendrocytes that  
683 express Sox10, Olig2 and PMP2. Surprisingly, we observed that these oligodendrocytes  
684 express HuC/D, a common neuronal marker of amacrine cells and ganglion cells. Thus,  
685 unambiguous identification of neurons in the GCL requires markers in addition to  
686 HuC/D. There were rare PMP2<sup>+</sup> cell in the inner INL of peripheral regions of retina that  
687 did not express neuronal markers, but expressed a set of markers associated with  
688 NIRG cells. One week after damage there was an increase in the number of EdU-

689 labeled oligodendrocytes, which suggests *de novo* myelination of axons in the NFL from  
690 newly generated oligodendrocytes. Further studies are required to determine whether  
691 the newly generated oligodendrocytes directly results in additional axon myelination.  
692 Notably, NMDA-damage is not expected to result in demyelination, which raises  
693 questions about the signals that promote the proliferation of oligodendrocytes. Without  
694 genetic models or viruses with appropriate tropism to lineage-trace the origin of newly  
695 generated oligodendrocytes, the origin of oligodendrocyte precursor cells remains  
696 uncertain.

697

### 698 ***The formation of proliferating MGPCs requires FABPs and FASN***

699 scRNA-seq data indicate that *FABP7* is expressed by resting MG in the postnatal  
700 chick retina. When the retina is damaged or treated with FGF2 and insulin the MG  
701 robustly upregulate *FABP5*, *FABP7* and *PMP2*. When FABPs are inhibited in damaged  
702 retinas, significantly fewer proliferating MGPCs are generated (Hoang et al., 2020).  
703 Similarly, MGPC proliferation was suppressed when inhibitor was applied before  
704 damage when only *FABP7* is highly expressed in MG. We observed diminished cell  
705 signaling through pSMAD1/5/8, pStat3, and mTor (pS6) in MG treated with FABP  
706 inhibitor. These findings are consistent with treatment-specific Ligand-Receptor  
707 interactions in glia treated by FABP inhibitor revealed by SingleCellSignalR analyses.  
708 Similarly, levels of pSMAD1/5/8 and pStat3 fell below detection in MG treated with  
709 FASN-inhibitor. These cell signaling pathways have been shown to promote the  
710 formation of proliferating MGPCs in the chick retina (Todd et al., 2016a; Todd et al.,  
711 2017). Further, we find loss of Ligand-Receptor interactions involving FGF, Midkine and  
712 Notch1 in retinal glia treated with FABP inhibitor. (Anthony et al., 2005). These  
713 pathways are necessary the formation of proliferating MGPCs (Fischer et al., 2009a;  
714 Fischer et al., 2009b; Ghai et al., 2010; Hayes et al., 2007). Consistent with our  
715 observations, Notch-signaling is known to be downstream of FABPs (Anthony et al.,  
716 2005).

717 FABP isoforms serve many different functions including cellular metabolism and  
718 cellular trafficking of lipid metabolites (Storch and Corsico, 2008). In addition to  
719 facilitating lipid metabolism, FABPs can also facilitate nuclear transport of hydrophobic

720 ligands for cell signaling such as PPAR (Tripathi et al., 2017), retinoic acid (Dawson and  
721 Xia, 2012), and endocannabinoids (Haj-Dahmane et al., 2018). Given the well-  
722 established involvement of FABPs in lipid metabolism, we found associations with the  
723 expression of FASN, which is important for producing long chain fatty acids (Kuhajda,  
724 2006). When we antagonize FASN with different small molecule inhibitors there are  
725 significant decreases in numbers of proliferating MGPCs. These findings provide further  
726 evidence that lipid metabolism is required for the transition of resting MG to activated  
727 states, and subsequent proliferation as progenitor-like cells. scRNA-seq data indicate  
728 that MG become reactive with FABP inhibition in the absence of neuronal damage;  
729 there was significant upregulation of genes associated with gliogenesis and reactivity.  
730 This broad shift in the gene-expression modules to induce reactive phenotypes was  
731 supported by evidence for Ligand-Receptor interactions associated with reactivity  
732 including signals such as IL1 $\beta$ , TGF $\beta$  and HB-EGF.

733         Although inhibition of FABPs in undamaged retinas stimulated MG to adopt a  
734 reactive phenotype and acquire a transcriptomic profile characteristic of activation and  
735 de-differentiation, FABP-inhibition prior to NMDA did not prime MG to become MGPCs.  
736 This likely resulted from FABP-inhibition up-regulating gene modules associated with  
737 gliogenesis and down-regulation of gene modules associated with neurogenesis and  
738 proliferation. FABP-inhibition in undamaged retinas should have inhibited FABP7 in  
739 resting MG and PMP2 in oligodendrocytes, and this inhibition may have resulted in the  
740 activated transcriptomic profiles seen in MG and microglia. However, treatment with  
741 FABP inhibitor resulted in an upregulation of *FABP5* and *PMP2* in MG and *FABP5*,  
742 *FABP7* and *PMP2* in microglia. Thus, it is possible that the suppressed formation of  
743 MGPCs following FABP inhibition resulted from upregulation and inhibition of FABPs in  
744 MG and microglia.

745

#### 746 ***FABP-inhibition suppresses proliferation and induces reactivity in microglia***

747         The development of FABP inhibitors was motivated by the presence of FABP4 in  
748 obese patients suffering from atherosclerosis, where macrophages contribute the  
749 narrowing of arterial vessels (Furuhashi et al., 2007; Makowski et al., 2001). Peripheral  
750 macrophages express FABP4 and inhibition may slow the progression of vessel



751 narrowing (Furuhashi et al., 2007; Makowski et al., 2001). After retinal damage in chick,  
752 microglia normally proliferate and acquire a reactive phenotype (Zelinka et al., 2012b).  
753 The presence of reactive microglia is required for the formation of MGPCs (Fischer et  
754 al., 2014b). Further, signals from reactive microglia mediate inflammatory signaling in  
755 MG through pathways such as NFkB (Palazzo et al., 2020). Given that microglia rapidly  
756 respond to retinal damage with upregulation of pro-inflammatory signals (Todd et al.,  
757 2019), it is possible that reduced numbers of microglia in damaged retinas treated with  
758 FABP inhibitor also influenced the formation of proliferating MGPCs. In damaged retinas  
759 treated with FABP inhibitor, microglia appeared highly reactive, but the numbers of  
760 these cells were significantly reduced. Further, we did not detect significant numbers of  
761 microglial genes that were differentially expressed in damaged retinas treated with  
762 FABP inhibitor. Thus, it seems most likely that microglia did not influence the formation  
763 of MGPCs in inhibitor-treated retinas.

764

#### 765 **Conclusions:**

766 FASN and FABPs are novel targets of investigation with respect to retinal glia  
767 and reprogramming of MG into MGPCs. We found that FABPs are highly expressed by  
768 MG during reprogramming into proliferating MGPCs. Inhibition of FABPs results in the  
769 upregulation of genes associated with gliogenesis and inflammation while concurrently  
770 reducing the expression of genes associated with proliferation and neurogenesis. The  
771 anti-proliferative effects of FABP inhibition were not specific to MG, as microglia also  
772 showed reduced proliferation in inhibitor-treated retinas. By contrast, the proliferation of  
773 CMZ was unaffected by FABP inhibitor. Our findings suggest that FABPs mediate glial  
774 reactivity and de-differentiation through lipid-associated cell signaling, while proliferation  
775 requires lipid metabolism. Consistent with this hypothesis, inhibition of FASN potentially  
776 inhibited the formation of proliferating MGPCs, while decreasing cell death and  
777 increasing microglial proliferation. Microglia express FABPs, and FABP inhibition alters  
778 cytokine production and reactivity which is expected to impact signaling with MG.  
779 Collectively, our data suggest the activity of FASN and FABPs MG to become activated  
780 prior to forming proliferating MGPCs in the chick retina.

781

782

783 **Author contributions:** WAC – experimental design, execution of experiments,  
784 collection of data, data analysis, construction of figures and writing the manuscript. AT,  
785 EH and MH – execution of experiments and collection of data. HE - experimental  
786 design, collection of data, data analysis and writing the manuscript. TH and SB –  
787 preparation of scRNA-seq libraries. AJF – experimental design, data analysis,  
788 construction of figures and writing the manuscript.

789

790 **Data availability:** RNA-Seq data for gene-cell matrices are deposited at GitHub

791 <https://github.com/jiewwwang/Single-cell-retinal-regeneration>

792 [https://github.com/fischerlab3140/scRNAseq\\_libraries](https://github.com/fischerlab3140/scRNAseq_libraries)

793 Some of the scRNA-seq data can be queried at

794 <https://proteinpaint.stjude.org/F/2019.retina.scRNA.html>.

795

796

797

798 **References:**

- 799 **Allen, J. A., Halverson-Tamboli, R. A. and Rasenick, M. M.** (2007). Lipid raft microdomains  
800 and neurotransmitter signalling. *Nat. Rev. Neurosci.* **8**, 128–140.
- 801 **Anthony, T. E., Mason, H. A., Gridley, T., Fishell, G. and Heintz, N.** (2005). Brain lipid-  
802 binding protein is a direct target of Notch signaling in radial glial cells. *Genes Dev.* **19**,  
803 1028–1033.
- 804 **Bernardos, R. L., Barthel, L. K., Meyers, J. R. and Raymond, P. A.** (2007). Late-stage  
805 neuronal progenitors in the retina are radial Muller glia that function as retinal stem cells.  
806 *J Neurosci* **27**, 7028–40.
- 807 **Blackshaw, S. and Sanes, J. R.** (2021). Turning lead into gold: reprogramming retinal cells to  
808 cure blindness. *J. Clin. Invest.* **131**,.
- 809 **Bogdan, D., Falcone, J., Kanjiya, M. P., Park, S. H., Carbonetti, G., Studholme, K., Gomez,  
810 M., Lu, Y., Elmes, M. W., Smietalo, N., et al.** (2018). Fatty acid-binding protein 5  
811 controls microsomal prostaglandin E synthase 1 (mPGES-1) induction during  
812 inflammation. *J. Biol. Chem.* **293**, 5295–5306.
- 813 **Butler, A., Hoffman, P., Smibert, P., Papalexi, E. and Satija, R.** (2018). Integrating single-cell  
814 transcriptomic data across different conditions, technologies, and species. *Nat.*  
815 *Biotechnol.* **36**, 411–420.
- 816 **Cabello-Aguilar, S., Alame, M., Kon-Sun-Tack, F., Fau, C., Lacroix, M. and Colinge, J.**  
817 (2020). SingleCellSignalR: inference of intercellular networks from single-cell  
818 transcriptomics. *Nucleic Acids Res.* **48**, e55.
- 819 **Campbell, W. A., Fritsch-Kelleher, A., Palazzo, I., Hoang, T., Blackshaw, S. and Fischer, A.**  
820 **J.** (2021a). Midkine is neuroprotective and influences glial reactivity and the formation of  
821 Müller glia-derived progenitor cells in chick and mouse retinas. *Glia* **69**, 1515–1539.
- 822 **Campbell, W. A., Blum, S., Reske, A., Hoang, T., Blackshaw, S. and Fischer, A. J.** (2021b).  
823 Cannabinoid signaling promotes the de-differentiation and proliferation of Müller glia-  
824 derived progenitor cells. *Glia*.
- 825 **Dawson, M. I. and Xia, Z.** (2012). The retinoid X receptors and their ligands. *Biochim. Biophys.*  
826 *Acta* **1821**, 21–56.
- 827 **Fausett, B. V. and Goldman, D.** (2006). A role for alpha1 tubulin-expressing Muller glia in  
828 regeneration of the injured zebrafish retina. *J Neurosci* **26**, 6303–13.
- 829 **Fausett, B. V., Gumerson, J. D. and Goldman, D.** (2008). The proneural basic helix-loop-helix  
830 gene *ascl1a* is required for retina regeneration. *J. Neurosci. Off. J. Soc. Neurosci.* **28**,  
831 1109–1117.
- 832 **Feng, L., Hatten, M. E. and Heintz, N.** (1994). Brain lipid-binding protein (BLBP): A novel  
833 signaling system in the developing mammalian CNS. *Neuron* **12**, 895–908.
- 834 **Fischer, A. J. and Bongini, R.** (2010). Turning Müller glia into neural progenitors in the retina.  
835 *Mol. Neurobiol.* **42**, 199–209.

- 836 **Fischer, A. J. and Reh, T. A.** (2000). Identification of a proliferating marginal zone of retinal  
837 progenitors in postnatal chickens. *Dev. Biol.* **220**, 197–210.
- 838 **Fischer, A. J. and Reh, T. A.** (2001). Müller glia are a potential source of neural regeneration in  
839 the postnatal chicken retina. *Nat. Neurosci.* **4**, 247–252.
- 840 **Fischer, A. J. and Reh, T. A.** (2002). Exogenous growth factors stimulate the regeneration of  
841 ganglion cells in the chicken retina. *Dev. Biol.* **251**, 367–379.
- 842 **Fischer, A. J. and Reh, T. A.** (2003). Potential of Muller glia to become neurogenic retinal  
843 progenitor cells. *Glia* **43**, 70–6.
- 844 **Fischer, A. J., Seltner, R. L. P., Poon, J. and Stell, W. K.** (1998). Immunocytochemical  
845 characterization of quisqualic acid- and N-methyl-D-aspartate-induced excitotoxicity in  
846 the retina of chicks. *J. Comp. Neurol.* **393**, 1–15.
- 847 **Fischer, A. J., McGuire, C. R., Dierks, B. D. and Reh, T. A.** (2002). Insulin and fibroblast  
848 growth factor 2 activate a neurogenic program in Müller glia of the chicken retina. *J.*  
849 *Neurosci. Off. J. Soc. Neurosci.* **22**, 9387–9398.
- 850 **Fischer, A. J., Omar, G., Walton, N. A., Verrill, T. A. and Unson, C. G.** (2005). Glucagon-  
851 expressing neurons within the retina regulate the proliferation of neural progenitors in the  
852 circumferential marginal zone of the avian eye. *J. Neurosci. Off. J. Soc. Neurosci.* **25**,  
853 10157–10166.
- 854 **Fischer, A. J., Skorupa, D., Schonberg, D. L. and Walton, N. A.** (2006). Characterization of  
855 glucagon-expressing neurons in the chicken retina. *J. Comp. Neurol.* **496**, 479–494.
- 856 **Fischer, A. J., Foster, S., Scott, M. A. and Sherwood, P.** (2008). The transient expression of  
857 LIM-domain transcription factors is coincident with the delayed maturation of  
858 photoreceptors in the chicken retina. *J. Comp. Neurol.* **506**, 584–603.
- 859 **Fischer, A. J., Scott, M. A. and Tuten, W.** (2009a). Mitogen-activated protein kinase-signaling  
860 stimulates Müller glia to proliferate in acutely damaged chicken retina. *Glia* **57**, 166–181.
- 861 **Fischer, A. J., Scott, M. A., Ritchey, E. R. and Sherwood, P.** (2009b). Mitogen-activated  
862 protein kinase-signaling regulates the ability of Müller glia to proliferate and protect  
863 retinal neurons against excitotoxicity. *Glia* **57**, 1538–1552.
- 864 **Fischer, A. J., Scott, M. A., Zelinka, C. and Sherwood, P.** (2010). A novel type of glial cell in  
865 the retina is stimulated by insulin-like growth factor 1 and may exacerbate damage to  
866 neurons and Muller glia. *Glia* **58**, 633–49.
- 867 **Fischer, A. J., Bosse, J. L. and El-Hodiri, H. M.** (2014a). Reprint of: the ciliary marginal zone  
868 (CMZ) in development and regeneration of the vertebrate eye. *Exp. Eye Res.* **123**, 115–  
869 120.
- 870 **Fischer, A. J., Zelinka, C., Gallina, D., Scott, M. A. and Todd, L.** (2014b). Reactive microglia  
871 and macrophage facilitate the formation of Müller glia-derived retinal progenitors. *Glia*  
872 **62**, 1608–1628.

- 873 **Furuhashi, M., Tuncman, G., Görgün, C. Z., Makowski, L., Atsumi, G., Vaillancourt, E.,**  
874 **Kono, K., Babaev, V. R., Fazio, S., Linton, M. F., et al.** (2007). Treatment of diabetes  
875 and atherosclerosis by inhibiting fatty-acid-binding protein aP2. *Nature* **447**, 959–965.
- 876 **Gallina, D., Todd, L. and Fischer, A. J.** (2014a). A comparative analysis of Müller glia-  
877 mediated regeneration in the vertebrate retina. *Exp. Eye Res.* **123**, 121–130.
- 878 **Gallina, D., Zelinka, C. and Fischer, A. J.** (2014b). Glucocorticoid receptors in the retina,  
879 Müller glia and the formation of Müller glia-derived progenitors. *Dev. Camb. Engl.* **141**,  
880 3340–3351.
- 881 **Ghai, K., Zelinka, C. and Fischer, A. J.** (2009). Serotonin released from amacrine neurons is  
882 scavenged and degraded in bipolar neurons in the retina. *J. Neurochem.* **111**, 1–14.
- 883 **Ghai, K., Zelinka, C. and Fischer, A. J.** (2010). Notch signaling influences neuroprotective and  
884 proliferative properties of mature Müller glia. *J. Neurosci. Off. J. Soc. Neurosci.* **30**,  
885 3101–3112.
- 886 **Haj-Dahmane, S., Shen, R.-Y., Elmes, M. W., Studholme, K., Kanjiya, M. P., Bogdan, D.,**  
887 **Thanos, P. K., Miyauchi, J. T., Tzirka, S. E., Deutsch, D. G., et al.** (2018). Fatty-acid-  
888 binding protein 5 controls retrograde endocannabinoid signaling at central glutamate  
889 synapses. *Proc. Natl. Acad. Sci.* **115**, 3482–3487.
- 890 **Hamburger, V. and Hamilton, H. L.** (1992). A series of normal stages in the development of  
891 the chick embryo. 1951. *Dev Dyn* **195**, 231–72.
- 892 **Hamon, A., García-García, D., Ail, D., Bitard, J., Chesneau, A., Dalkara, D., Locker, M.,**  
893 **Roger, J. E. and Perron, M.** (2019). Linking YAP to Müller Glia Quiescence Exit in the  
894 Degenerative Retina. *Cell Rep.* **27**, 1712-1725.e6.
- 895 **Hanhoff, T., Lücke, C. and Spener, F.** (2002). Insights into binding of fatty acids by fatty acid  
896 binding proteins. *Mol. Cell. Biochem.* **239**, 45–54.
- 897 **Hayes, S., Nelson, B. R., Buckingham, B. and Reh, T. A.** (2007). Notch signaling regulates  
898 regeneration in the avian retina. *Dev Biol* **312**, 300–11.
- 899 **Hitchcock, P. F. and Raymond, P. A.** (1992). Retinal regeneration. *Trends Neurosci* **15**, 103–  
900 8.
- 901 **Hoang, T., Wang, J., Boyd, P., Wang, F., Santiago, C., Jiang, L., Yoo, S., Lahne, M., Todd,**  
902 **L. J., Jia, M., et al.** (2020). Gene regulatory networks controlling vertebrate retinal  
903 regeneration. *Science* **370**,.
- 904 **Jorstad, N. L., Wilken, M. S., Grimes, W. N., Wohl, S. G., VandenBosch, L. S., Yoshimatsu,**  
905 **T., Wong, R. O., Rieke, F. and Reh, T. A.** (2017). Stimulation of functional neuronal  
906 regeneration from Muller glia in adult mice. *Nature*.
- 907 **Karl, M. O., Hayes, S., Nelson, B. R., Tan, K., Buckingham, B. and Reh, T. A.** (2008).  
908 Stimulation of neural regeneration in the mouse retina. *Proc Natl Acad Sci U A* **105**,  
909 19508–13.

- 910 **Kohsaka, S., Takamatsu, K., Nishimura, Y., Mikoshiba, K. and Tsukada, Y.** (1980).  
911 Neurochemical characteristics of myelin-like structure in the chick retina. *J Neurochem*  
912 **34**, 662–8.
- 913 **Kohsaka, S., Nishimura, Y., Takamatsu, K., Shimai, K. and Tsukada, Y.** (1983).  
914 Immunohistochemical localization of 2',3'-cyclic nucleotide 3'-phosphodiesterase and  
915 myelin basic protein in the chick retina. *J. Neurochem.* **41**, 434–439.
- 916 **Kuhajda, F. P.** (2006). Fatty acid synthase and cancer: new application of an old pathway.  
917 *Cancer Res.* **66**, 5977–5980.
- 918 **Li, B., Zhang, G., Li, C., He, D., Li, X., Zhang, C., Tang, F., Deng, X., Lu, J., Tang, Y., et al.**  
919 (2012). Identification of JAK2 as a mediator of FIP1L1-PDGFR $\alpha$ -induced eosinophil  
920 growth and function in CEL. *PLoS One* **7**, e34912.
- 921 **Makowski, L., Boord, J. B., Maeda, K., Babaev, V. R., Uysal, K. T., Morgan, M. A., Parker,**  
922 **R. A., Suttles, J., Fazio, S., Hotamisligil, G. S., et al.** (2001). Lack of macrophage  
923 fatty-acid-binding protein aP2 protects mice deficient in apolipoprotein E against  
924 atherosclerosis. *Nat. Med.* **7**, 699–705.
- 925 **Moshiri, A., McGuire, C. R. and Reh, T. A.** (2005). Sonic hedgehog regulates proliferation of  
926 the retinal ciliary marginal zone in posthatch chicks. *Dev Dyn* **233**, 66–75.
- 927 **Ohmachi, T., Inoue, H., Mimori, K., Tanaka, F., Sasaki, A., Kanda, T., Fujii, H., Yanaga, K.**  
928 **and Mori, M.** (2006). Fatty Acid Binding Protein 6 Is Overexpressed in Colorectal  
929 Cancer. *Clin. Cancer Res.* **12**, 5090–5095.
- 930 **Ooto, S., Akagi, T., Kageyama, R., Akita, J., Mandai, M., Honda, Y. and Takahashi, M.**  
931 (2004). Potential for neural regeneration after neurotoxic injury in the adult mammalian  
932 retina. *Proc Natl Acad Sci U S A* **101**, 13654–9.
- 933 **Owada, Y.** (2008). Fatty acid binding protein: localization and functional significance in the  
934 brain. *Tohoku J. Exp. Med.* **214**, 213–220.
- 935 **Palazzo, I., Deistler, K., Hoang, T. V., Blackshaw, S. and Fischer, A. J.** (2020). NF- $\kappa$ B  
936 signaling regulates the formation of proliferating Müller glia-derived progenitor cells in  
937 the avian retina. *Development* **147**,.
- 938 **Peng, X., Studholme, K., Kanjiya, M. P., Luk, J., Bogdan, D., Elmes, M. W., Carbonetti, G.,**  
939 **Tong, S., Gary Teng, Y.-H., Rizzo, R. C., et al.** (2017). Fatty-acid-binding protein  
940 inhibition produces analgesic effects through peripheral and central mechanisms. *Mol.*  
941 *Pain* **13**, 1744806917697007.
- 942 **Pollak, J., Wilken, M. S., Ueki, Y., Cox, K. E., Sullivan, J. M., Taylor, R. J., Levine, E. M. and**  
943 **Reh, T. A.** (2013). Ascl1 reprograms mouse Muller glia into neurogenic retinal  
944 progenitors. *Development* **140**, 2619–2631.
- 945 **Popielarczyk, T. L., Huckle, W. R. and Barrett, J. G.** (2019). Human Bone Marrow-Derived  
946 Mesenchymal Stem Cells Home via the PI3K-Akt, MAPK, and Jak/Stat Signaling  
947 Pathways in Response to Platelet-Derived Growth Factor. *Stem Cells Dev.* **28**, 1191–  
948 1202.

- 949 **Qiu, X., Hill, A., Packer, J., Lin, D., Ma, Y.-A. and Trapnell, C.** (2017a). Single-cell mRNA  
950 quantification and differential analysis with Census. *Nat. Methods* **14**, 309–315.
- 951 **Qiu, X., Mao, Q., Tang, Y., Wang, L., Chawla, R., Pliner, H. A. and Trapnell, C.** (2017b).  
952 Reversed graph embedding resolves complex single-cell trajectories. *Nat. Methods* **14**,  
953 979–982.
- 954 **Raymond, P. A.** (1991). Retinal regeneration in teleost fish. *Ciba Found Symp* **160**, 171–86;  
955 discussion 186-91.
- 956 **Reichenbach, A. and Bringmann, A.** (2013). New functions of Müller cells. *Glia* **61**, 651–678.
- 957 **Ritchey, E. R., Zelinka, C. P., Tang, J., Liu, J. and Fischer, A. J.** (2012). The combination of  
958 IGF1 and FGF2 and the induction of excessive ocular growth and extreme myopia. *Exp.*  
959 *Eye Res.* **99**, 1–16.
- 960 **Rompani, S. B. and Cepko, C. L.** (2010). A Common Progenitor for Retinal Astrocytes and  
961 Oligodendrocytes. *J. Neurosci.* **30**, 4970–4980.
- 962 **Rueda, E. M., Hall, B. M., Hill, M. C., Swinton, P. G., Tong, X., Martin, J. F. and Poché, R. A.**  
963 (2019). The Hippo Pathway Blocks Mammalian Retinal Müller Glial Cell Reprogramming.  
964 *Cell Rep.* **27**, 1637-1649.e6.
- 965 **Satija, R., Farrell, J. A., Gennert, D., Schier, A. F. and Regev, A.** (2015). Spatial  
966 reconstruction of single-cell gene expression data. *Nat Biotechnol* **33**, 495–502.
- 967 **Sellner, P. A.** (1993). Retinal FABP principally localizes to neurons and not to glial cells. *Mol.*  
968 *Cell. Biochem.* **123**, 121–127.
- 969 **Sellner, P. A., Chu, W., Glatz, J. F. and Berman, N. E.** (1995). Developmental role of fatty  
970 acid-binding proteins in mouse brain. *Brain Res. Dev. Brain Res.* **89**, 33–46.
- 971 **Senga, S., Kawaguchi, K., Kobayashi, N., Ando, A. and Fujii, H.** (2018). A novel fatty acid-  
972 binding protein 5-estrogen-related receptor  $\alpha$  signaling pathway promotes cell growth  
973 and energy metabolism in prostate cancer cells. *Oncotarget* **9**, 31753–31770.
- 974 **Smathers, R. L. and Petersen, D. R.** (2011). The human fatty acid-binding protein family:  
975 evolutionary divergences and functions. *Hum. Genomics* **5**, 170–191.
- 976 **Storch, J. and Corsico, B.** (2008). The Emerging Functions and Mechanisms of Mammalian  
977 Fatty Acid-Binding Proteins. *Annu. Rev. Nutr.* **28**, 73–95.
- 978 **Todd, L. and Fischer, A. J.** (2015). Hedgehog-signaling stimulates the formation of  
979 proliferating Müller glia-derived progenitor cells in the retina. *Development* **142**, 2610–  
980 2622.
- 981 **Todd, L., Volkov, L. I., Zelinka, C., Squires, N. and Fischer, A. J.** (2015). Heparin-binding  
982 EGF-like growth factor (HB-EGF) stimulates the proliferation of Müller glia-derived  
983 progenitor cells in avian and murine retinas. *Mol. Cell. Neurosci.* **69**, 54–64.

- 984 **Todd, L., Squires, N., Suarez, L. and Fischer, A. J.** (2016a). Jak/Stat signaling regulates the  
985 proliferation and neurogenic potential of Müller glia-derived progenitor cells in the avian  
986 retina. *Sci. Rep.* **6**, 35703.
- 987 **Todd, L., Suarez, L., Squires, N., Zelinka, C. P., Gribbins, K. and Fischer, A. J.** (2016b).  
988 Comparative analysis of glucagonergic cells, glia, and the circumferential marginal zone  
989 in the reptilian retina. *J. Comp. Neurol.* **524**, 74–89.
- 990 **Todd, L., Palazzo, I., Squires, N., Mendonca, N. and Fischer, A. J.** (2017). BMP- and TGFβ-  
991 signaling regulate the formation of Müller glia-derived progenitor cells in the avian retina.  
992 *Glia* **65**, 1640–1655.
- 993 **Todd, L., Suarez, L., Quinn, C. and Fischer, A. J.** (2018). Retinoic Acid-Signaling Regulates  
994 the Proliferative and Neurogenic Capacity of Müller Glia-Derived Progenitor Cells in the  
995 Avian Retina. *Stem Cells Dayt. Ohio* **36**, 392–405.
- 996 **Todd, L., Palazzo, I., Suarez, L., Liu, X., Volkov, L., Hoang, T. V., Campbell, W. A.,**  
997 **Blackshaw, S., Quan, N. and Fischer, A. J.** (2019). Reactive microglia and IL1β/IL-  
998 1R1-signaling mediate neuroprotection in excitotoxin-damaged mouse retina. *J.*  
999 *Neuroinflammation* **16**, 118.
- 1000 **Todd, L., Finkbeiner, C., Wong, C. K., Hooper, M. J. and Reh, T. A.** (2020). Microglia  
1001 Suppress Ascl1-Induced Retinal Regeneration in Mice. *Cell Rep.* **33**, 108507.
- 1002 **Trapnell, C., Roberts, A., Goff, L., Pertea, G., Kim, D., Kelley, D. R., Pimentel, H., Salzberg,**  
1003 **S. L., Rinn, J. L. and Pachter, L.** (2012). Differential gene and transcript expression  
1004 analysis of RNA-seq experiments with TopHat and Cufflinks. *Nat Protoc* **7**, 562–78.
- 1005 **Tripathi, S., Kushwaha, R., Mishra, J., Gupta, M. K., Kumar, H., Sanyal, S., Singh, D.,**  
1006 **Sanyal, S., Sahasrabudde, A. A., Kamthan, M., et al.** (2017). Docosahexaenoic acid  
1007 up-regulates both PI3K/AKT-dependent FABP7-PPARγ interaction and MKP3 that  
1008 enhance GFAP in developing rat brain astrocytes. *J. Neurochem.* **140**, 96–113.
- 1009 **Ueki, Y., Wilken, M. S., Cox, K. E., Chipman, L., Jorstad, N., Sternhagen, K., Simic, M.,**  
1010 **Ullom, K., Nakafuku, M. and Reh, T. A.** (2015). Transgenic expression of the proneural  
1011 transcription factor Ascl1 in Muller glia stimulates retinal regeneration in young mice.  
1012 *Proc Natl Acad Sci U S A* **112**, 13717–22.
- 1013 **Wan, J. and Goldman, D.** (2016). Retina regeneration in zebrafish. *Curr Opin Genet Dev* **40**,  
1014 41–47.
- 1015 **Wan, J., Ramachandran, R. and Goldman, D.** (2012). HB-EGF is necessary and sufficient for  
1016 Müller glia dedifferentiation and retina regeneration. *Dev Cell* **22**, 334–47.
- 1017 **White, D. T., Sengupta, S., Saxena, M. T., Xu, Q., Hanes, J., Ding, D., Ji, H. and Mumm, J.**  
1018 **S.** (2017). Immunomodulation-accelerated neuronal regeneration following selective rod  
1019 photoreceptor cell ablation in the zebrafish retina. *Proc. Natl. Acad. Sci. U. S. A.* **114**,  
1020 E3719–E3728.
- 1021 **Yamashima, T.** (2012). “PUFA-GPR40-CREB signaling” hypothesis for the adult primate  
1022 neurogenesis. *Prog. Lipid Res.* **51**, 221–231.



- 1023 **Yao, K., Qiu, S., Wang, Y. V., Park, S. J. H., Mohns, E. J., Mehta, B., Liu, X., Chang, B.,**  
1024 **Zenisek, D., Crair, M. C., et al.** (2018). Restoration of vision after de novo genesis of  
1025 rod photoreceptors in mammalian retinas. *Nature* **560**, 484–488.
- 1026 **Zelinka, C. P., Scott, M. A., Volkov, L. and Fischer, A. J.** (2012a). The reactivity, distribution  
1027 and abundance of Non-astrocytic Inner Retinal Glial (NIRG) cells are regulated by  
1028 microglia, acute damage, and IGF1. *PLoS One* **7**, e44477.
- 1029 **Zelinka, C. P., Scott, M. A., Volkov, L. and Fischer, A. J.** (2012b). The Reactivity, Distribution  
1030 and Abundance of Non-Astrocytic Inner Retinal Glial (NIRG) Cells Are Regulated by  
1031 Microglia, Acute Damage, and IGF1. *PLOS ONE* **7**, e44477.
- 1032 **Zelinka, C. P., Volkov, L., Goodman, Z. A., Todd, L., Palazzo, I., Bishop, W. A. and Fischer,**  
1033 **A. J.** (2016). mTor signaling is required for the formation of proliferating Müller glia-  
1034 derived progenitor cells in the chick retina. *Dev. Camb. Engl.* **143**, 1859–1873.
- 1035
- 1036

1037 **Table 1. List of antibodies, working dilution, clone/catalog number and source.**

| Antibody             | Dilution | Host   | Clone/Catalog number | Source         |
|----------------------|----------|--------|----------------------|----------------|
| Sox2                 | 1:1000   | Goat   | KOY0418121           | R&D            |
| Sox9                 | 1:2000   | Rabbit | AB5535               | Millipore      |
| Sox10                | 1:500    | Goat   | PA5-47001            | Invitrogen     |
| CD45                 | 1:200    | Mouse  | HIS-C7               | Prionics       |
| Nkx2.2               | 1:100    | Mouse  | 74.5A5               | DSHB           |
| PMP2                 | 1:100    | Rabbit | 12717.AP             | Proteintech    |
| AP2-alpha            | 1:50     | Mouse  | AP2A                 | DSHB           |
| Brn3a                | 1:50     | Mouse  | MAB1585              | Chemicon       |
| Islet1               | 1:50     | Mouse  | 40.2D6               | DSHB           |
| Tyrosine hydroxylase | 1:50     | Mouse  | aTH                  | DSHB           |
| Olig2                | 1:50     | Mouse  | PCRP-Olig2-1E9       | DSHB           |
| Vimentin             | 1:50     | Mouse  | H5                   | DSHB           |
| Glutamine synthetase | 1:1000   | Mouse  | 610517               | BD Biosciences |
| pS6                  | 1:750    | Rabbit | #2215; Ser240/244    | Cell Signaling |
| pStat3               | 1:100    | Rabbit | 9131                 | Cell Signaling |
| pSmad1/5/8           | 1:200    | Rabbit | D5B10                | Cell Signaling |

1038  
1039  
1040  
1041  
1042

1043 **Figure legends:**

1044

1045 **Figure 1.** Expression of *FABP5*, *FABP7* and *PMP2* in embryonic chick retina. scRNA-  
1046 seq libraries were generated from embryonic retinal cells at four stages of development  
1047 (E5, E8, E12, E15) (a). UMAP clustered were generated to identify cell types and probe  
1048 for gene expression (b). Cells were identified based on expression of cell-distinguishing  
1049 genes (a,b). FABP isoforms were plotted in a heatmap, with cells expressing 2+ genes  
1050 denoted in black (c). The expression of FABPs in different maturing cell types is  
1051 represented in violin plots (d). MG were also plotted in pseudotime denoting their  
1052 transition from an immature progenitor cell to mature glial cell (e). *FABP5* and *FABP7*  
1053 expression fluctuated during this transition as denoted by pseudotime scatter plots (f)  
1054 and pseudotime state violin plots (g). Significant difference (\* $p < 0.01$ , \*\* $p < 0.0001$ ,  
1055 \*\*\* $p < 0.0001$ ) was determined by using a Wilcox rank sum with Bonferoni correction.  
1056 RPC – retinal progenitor cell, MG – Müller glia, iMG – immature Müller glia, mMG -  
1057 mature Müller glia.

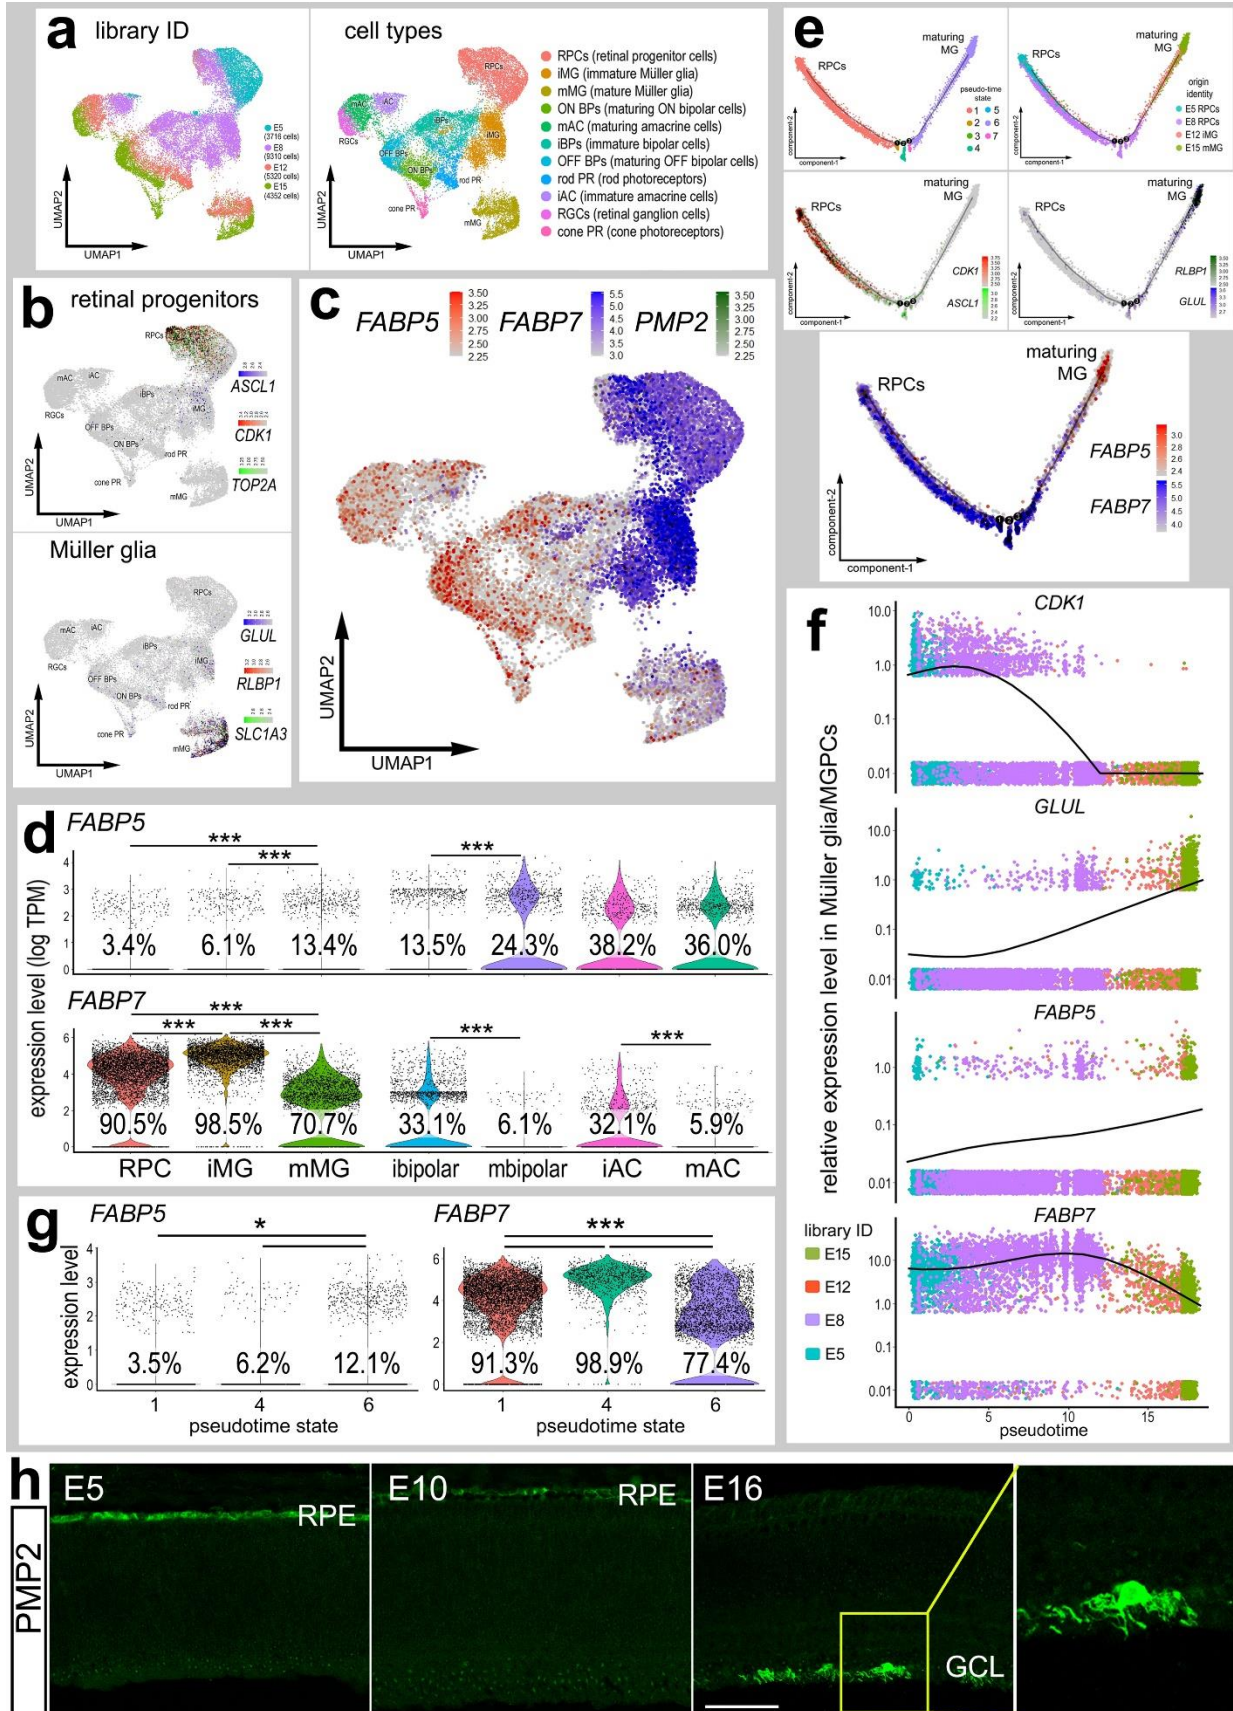

1059  
1060 **Figure 2.** Chick MG of damaged retinas express FABP isoforms preferentially during the  
1061 MGPC transition. scRNA-seq libraries of time points after NMDA damage were  
1062 aggregated and clustered with UMAP to identify unique MG clusters transitioning into  
1063 MGPCs (**a,b**). The levels of FABP7, FABP5, PMP2 in MG clusters, oligodendrocytes,  
1064 and nonastrocytic inner retinal glia (NIRG) cells are represented by violin plots (**d**). The  
1065 response of MG to damage was modelled in pseudotime, indicating a divergent  
1066 response between glial reactivity and de-differentiated MGPC (**e**). The expression levels  
1067 of FABPs are compared between a “reactive” and “reprogramming” response by MG.  
1068 FABP expression are shown in violin plots of MG in different transitional states (**f**).  
1069 These divergent transitions are shown on the pseudotime scatter plot with the reactive  
1070 and reprogramming branch are denoted by the black and red lines respectively (**g**).  
1071 Each dot in violin and scatter plots represents an individual cell. Significant changes  
1072 (\* $p < 0.1$ , \*\* $p < 0.0001$ , \*\*\* $p < 0.0001$ ) in levels were determined by using a Wilcoxon rank  
1073 sum with Bonferroni correction.

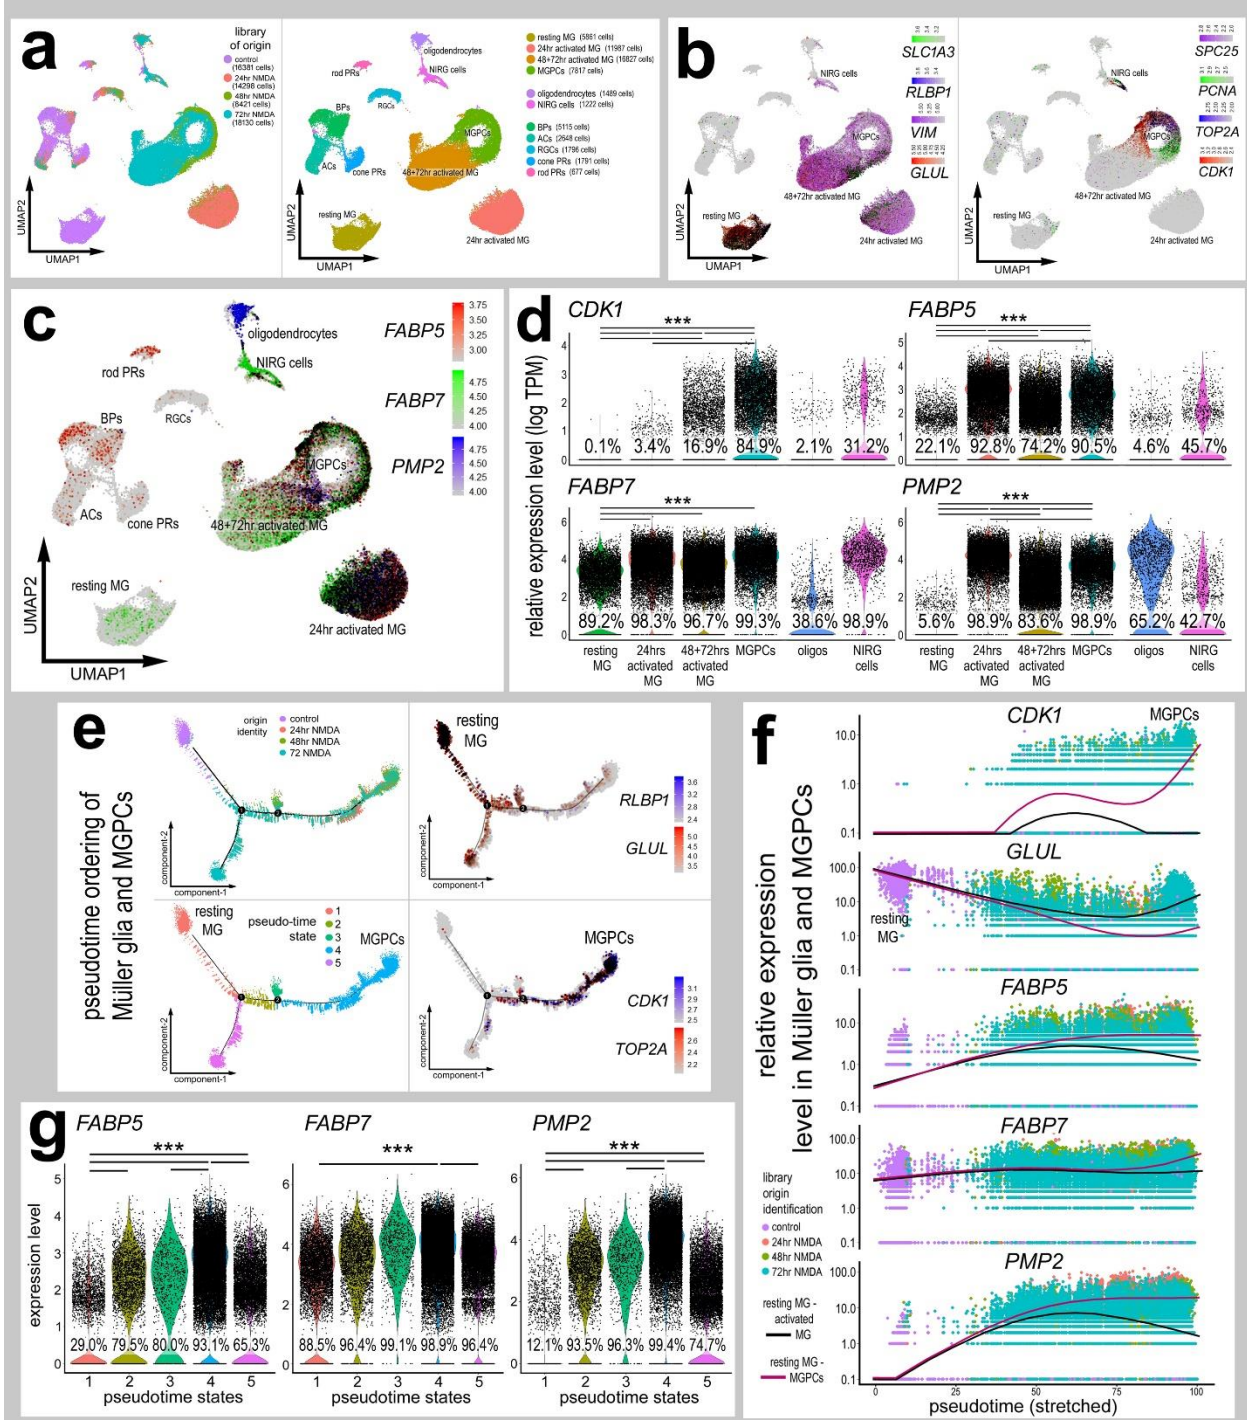

1074

1075

1076

1077

1078

1079 **Figure 3.** PMP2-immunoreactivity in chick retinas. Vertical sections of the retina were  
1080 obtained from untreated eyes (**a-e, g, h**) and eyes injected with NMDA (**i**). Tissues were  
1081 labeled with antibodies to PMP2 (green) and Ap2 $\alpha$  (red; **a**), Islet1 (red; **a**), tyrosine  
1082 hydroxylase (red; **a**), GS (red; **b**), Olig2 (red, **c,e**), HuC/D (red; **d**), EdU (blue; **g**), Sox10  
1083 (red; **g**), Sox2 (blue; **h,i**), and Nkx2.2 (red; **h,i**). Arrows indicate double-labeled cells.  
1084 Histograms illustrate the mean ( $\pm$  SD) number of EdU+/PMP2+ oligodendrocytes in  
1085 central and peripheral regions of the retina. Each dot represents one biological  
1086 replicate. Significance (\* $p$ <0.01) of difference was determined by using a Student's t-  
1087 test. Abbreviations: ONL – outer nuclear layer, INL – inner nuclear layer, IPL – inner  
1088 plexiform layer, GCL – ganglion cell layer, GS – glutamine synthetase. (**j**) scRNA-seq  
1089 was used to verify patterns of immunolabeling in NIRG cells and oligodendrocytes.  
1090 These cells were isolated with UMAP ordering maintained for libraries from control and  
1091 NMDA-damaged retinas. Heatmaps were generated to illustrate patterns of expression  
1092 of *FABP7*, *FABP5*, *PMP2*, *SOX10*, *OLIG2* and *ELAVL4*.

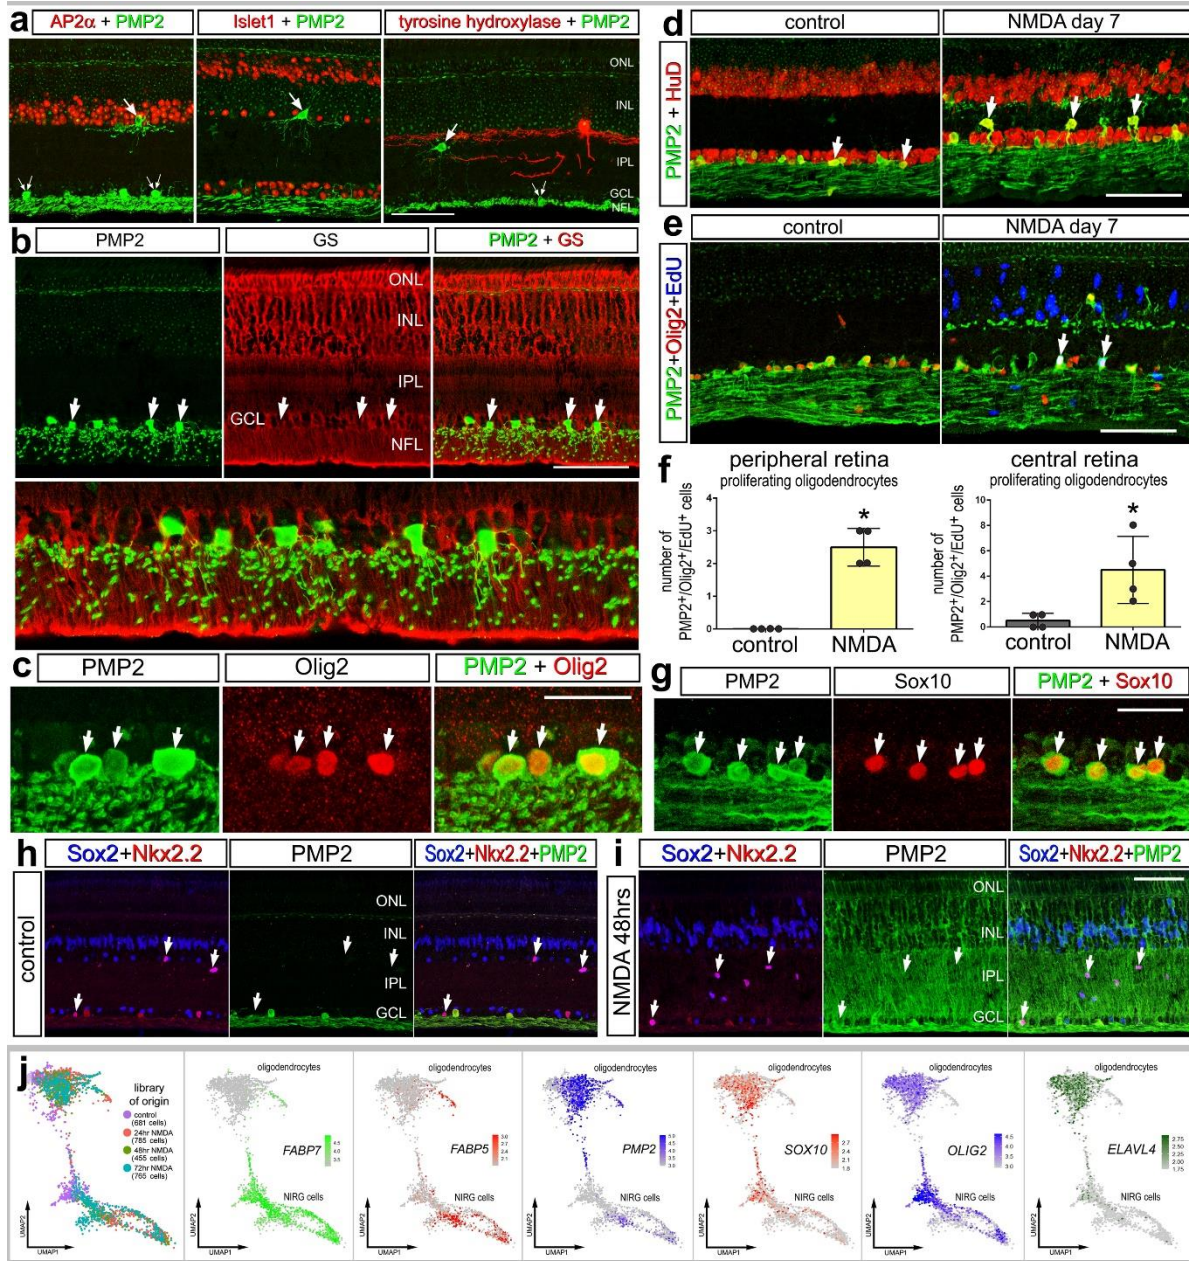

1093

1094

1095

1096

1097

1098

1099

1100

1101

1102 **Figure 4. Embryonic progenitors and MGPCs express different FABPs.** MG were  
1103 isolated from scRNA-seq libraries with significant numbers of MGPCs (retinas treated  
1104 with NMDA and/or FGF2+insulin) and significant numbers of retinal progenitor cells (E5  
1105 and E8 retinas). These cells were aggregated and ordered in UMAP plots (**a-c**). These  
1106 unique clusters were probed for levels of expression of *FABP5*, *FABP7*, and *PMP2* in  
1107 UMAP heatmap plots (**d-f**), and quantified in violin plots (**g**). Each dot in violin and  
1108 scatter plots represents an individual cell. Significant changes (\* $p < 0.1$ , \*\* $p < 0.0001$ ,  
1109 \*\*\* $p < 0.0001$ ) in levels were determined by using a Wilcox rank sum with Bonferroni  
1110 correction. The eyes of post-hatch chicks were injected with EdU, insulin +FGF2 and/or  
1111 FABP inhibitor (BMS309403) (**h-k**). Inhibition of FABPs had no effect upon the  
1112 proliferation of CMZ progenitors (**i-k**). Sections of the far peripheral retina and CMZ  
1113 were labeled for EdU-incorporation (red; **h,j,k**) and antibodies to PMP2 (green; **h**) or  
1114 Sox2 (green; **j,k**). The histogram in **i** represents the mean ( $\pm$  SD) and each dot  
1115 represents one biological replicate retina. The calibration bar in **k** represents 50  $\mu$ m  
1116 applies to **h**, **j** and **k**. Abbreviations: ONL – outer nuclear layer, INL – inner nuclear  
1117 layer, IPL – inner plexiform layer, GCL – ganglion cell layer, CMZ – circumferential  
1118 marginal zone. Significance of difference (\*\* $p < 0.01$ ) in mean numbers of EdU+ cells in  
1119 the CMZ and peripheral INL was determined by using ANOVA followed by a post-hoc t-  
1120 test with Bonferroni correction.  
1121  
1122



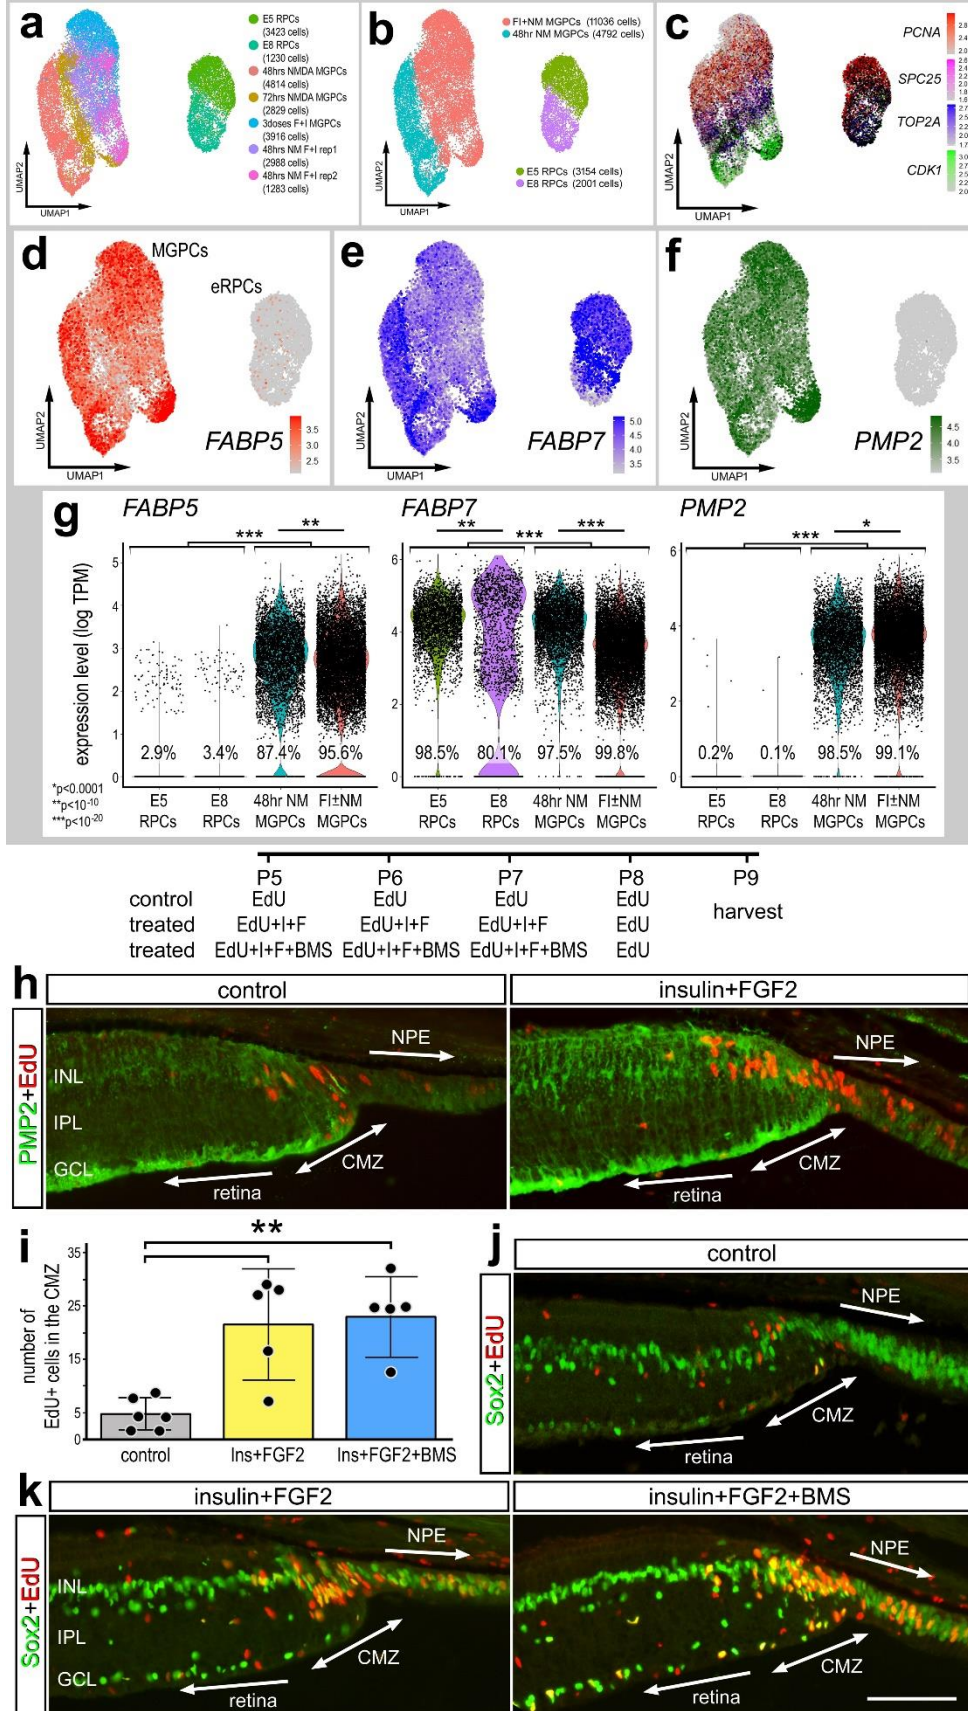

1124 **Fig 5. FGF2 and insulin induce expression of PMP2 and FABP5 in MG.** scRNA-seq  
1125 were established for chick retinas treated with saline or two or three doses of FGF2 and  
1126 insulin (a). UMAP ordering of cells revealed distinct clusters of retinal cell types (a).  
1127 Resting MG and growth factor-treated MG formed distinct clusters based on patterns of  
1128 expression including *GLUL*, *RLBP1* and *SLC1A3* (b). MGPCs were identified based on  
1129 patterns of expression of *NESTIN*, *CDK1* and *TOP2A* (b). UMAP heatmaps and violin  
1130 plots were established to illustrate patterns and levels of expression for *FABP5*, *FABP7*  
1131 and *PMP2* (c and d). MG were re-embedded and ordered across pseudotime with a  
1132 junction and trajectories populated by activated MG (mostly 2 doses of insulin and  
1133 FGF2) or proliferating MGPGs branches (mostly 3 doses of insulin and FGF2) (e).  
1134 Dimensional reduction of pseudotime to the X-axis placed resting MG (high *RLBP1*) to  
1135 the left and activated MG (black line) and MGPCs (red line; high *CDK1*) to the right (f).  
1136 Levels of *FABP5*, *FABP7* and *PMP2* were plotted across pseudotime (f).  
1137  
1138

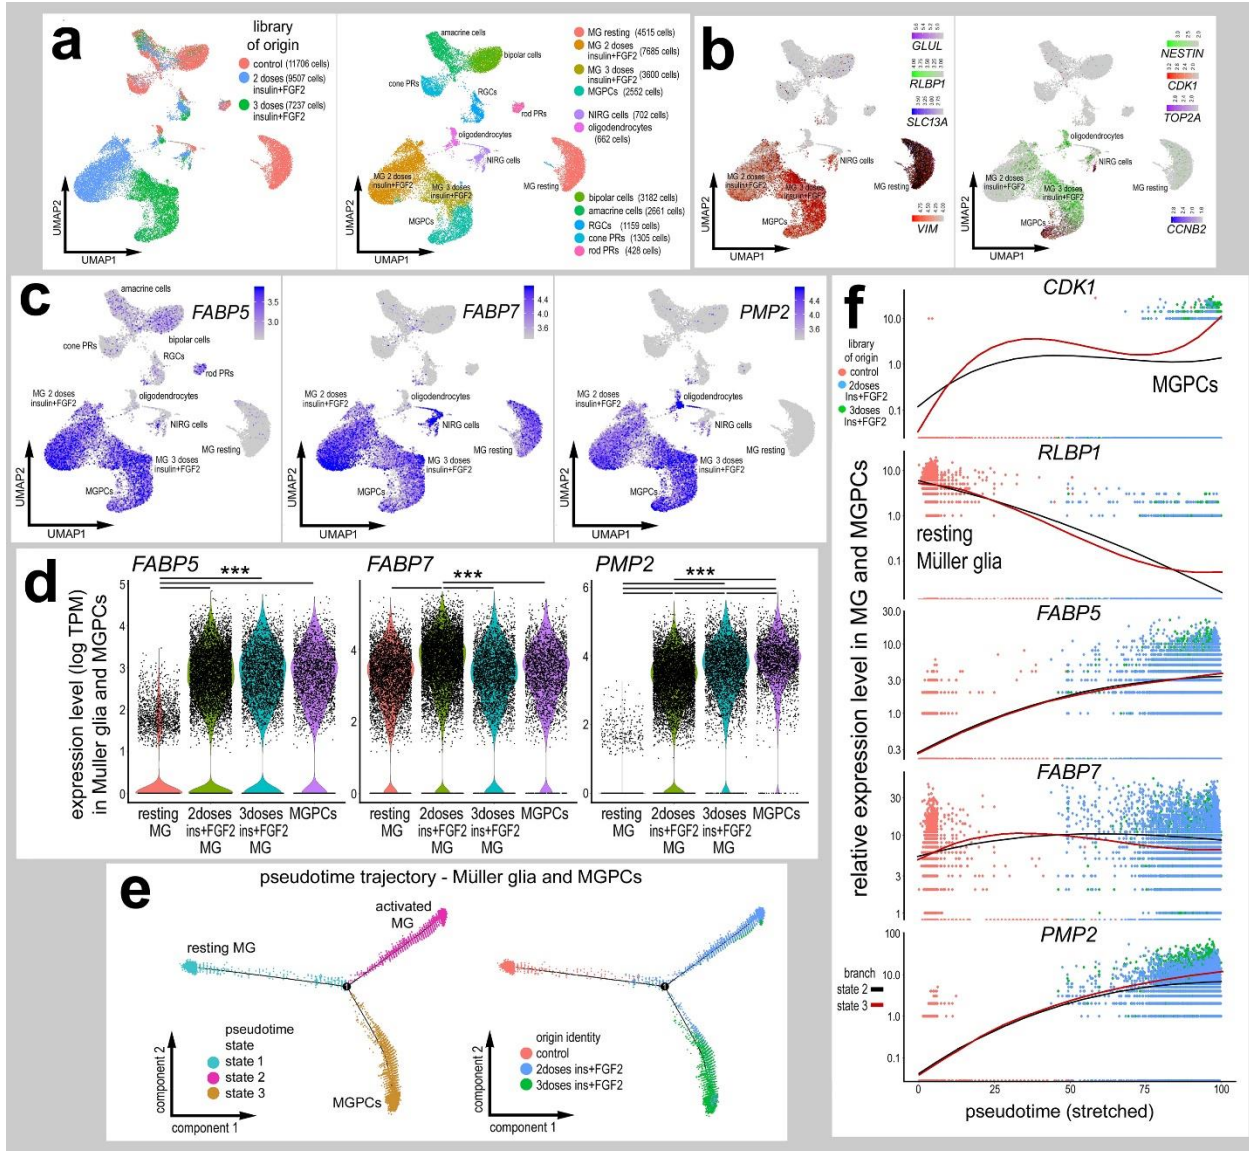

1139

1140

1141

1142

1143

1144

1145

1146

1147

1148

1149 **Figure 6.** Treatment of retinas with FGF2 stimulates MG to up-regulate PMP2 and  
1150 proliferate, and this proliferation can be blocked by FABP-inhibitor. **(a,b)** Eyes were  
1151 treated with 4 consecutive daily intraocular injections of FGF2, followed by 2  
1152 consecutive daily injections of EdU, and retinas harvested 2hrs after the last injection.  
1153 **(c,d)** Alternatively, eyes received 4 consecutive daily injections of FGF2 ± BMS309403,  
1154 followed by 2 consecutive daily injections of EdU, and eyes harvested 24hrs after the  
1155 last injection. Sections of the retina were labeled for EdU (red; **b**) and antibodies to  
1156 PMP2 (green; **a,b**) or Sox2 (blue in **b**, green in **c**). Arrows indicate MG nuclei labeled  
1157 for EdU and Sox2. The histogram in **d** represents the mean (± SD) and each dot  
1158 represents one biological replicate retina. Significance (\* $p < 0.01$ ) of difference was  
1159 determined by using a Student's t-test. The calibration bar represents 50  $\mu\text{m}$ .

1160

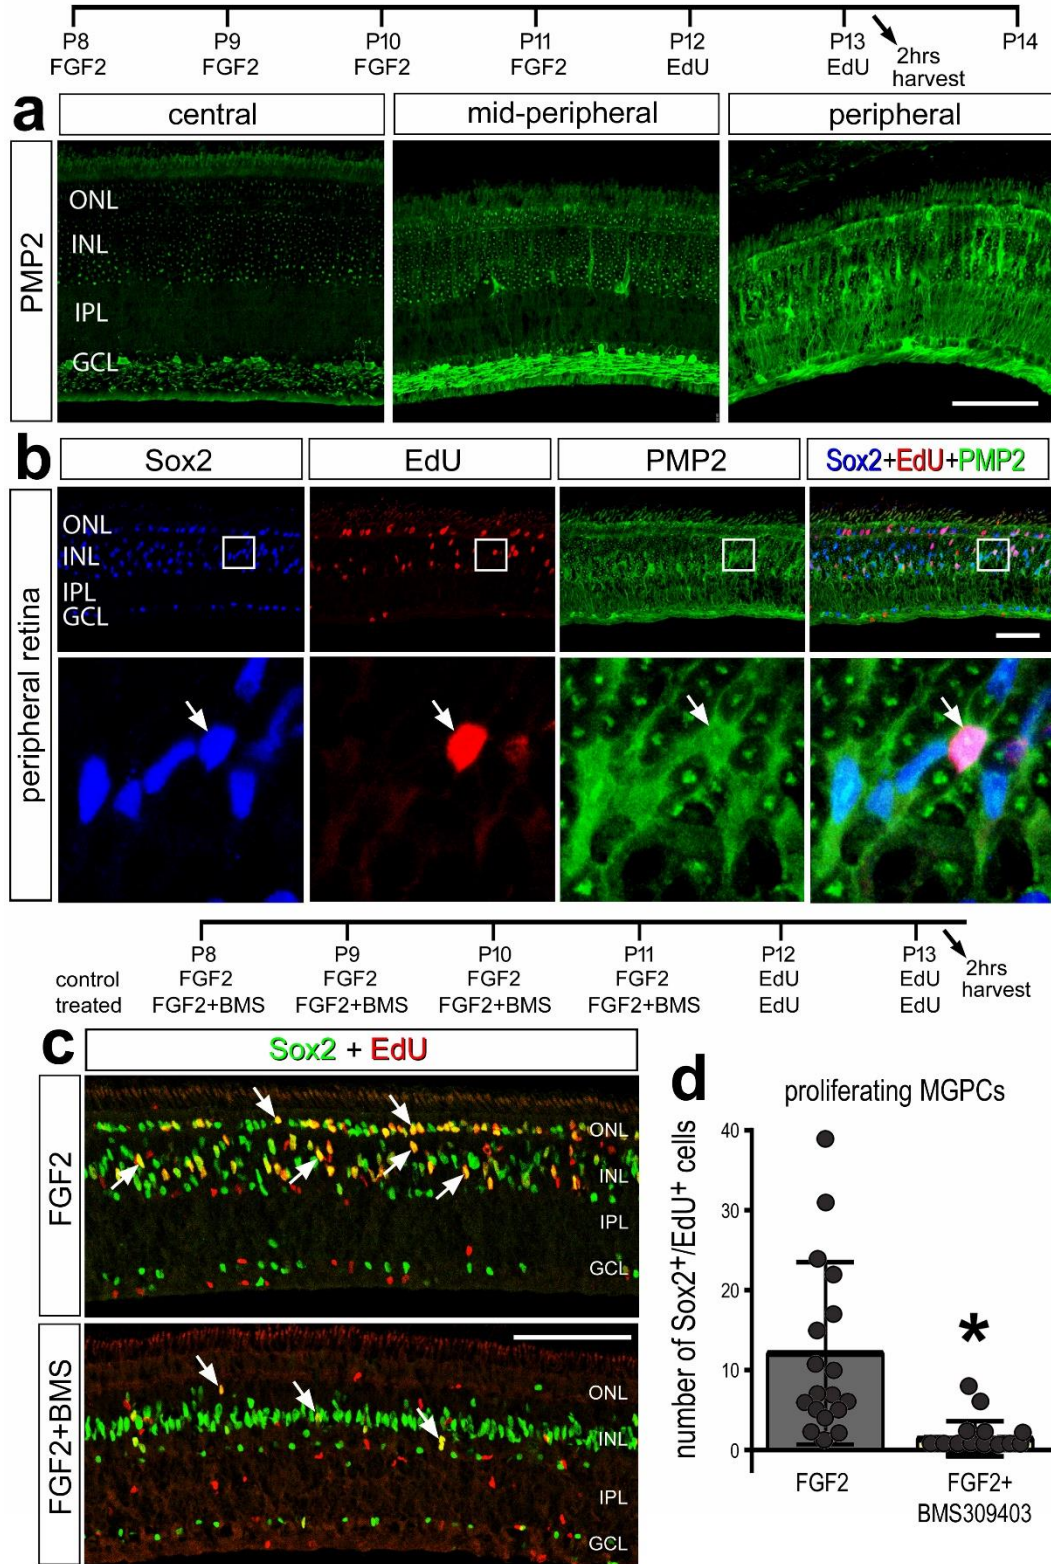

1161

1162

1163

1164

1165 **Figure 7. Inhibition of FABP significantly impacts single cell transcriptomic**

1166 **profiles of MG.** Retinas were treated with saline  $\pm$  BMS309403 or NMDA  $\pm$

1167 BMS309403, and scRNA seq libraries were generated to analyze changes in MG gene

1168 expression. UMAP ordering of cells was established and MG were identified based on

1169 expression of genes associated with activated glia (**d**), proliferating MGPCs (**e**), and

1170 resting glia (**f**). Differentially expressed genes (DEGs) were identified for MG from

1171 retinas treated with saline vs BMS-saline, saline vs NMDA, and NMDA vs BMS-NMDA

1172 and plotted in a Venn diagram (**c**). Dot plots indicating the percentage of expressing MG

1173 (size) and expression levels (heatmap) for genes related to resting glia, secreted

1174 factors, glial transcription factors, inflammation, glial reactivity and proliferation (**g, h**). All

1175 genes displayed in the Dot plot have significantly different ( $p < 0.0001$ ) expression levels

1176 in MG from retinas treated with saline vs saline-BMS (**g**) or in MG from retinas treated

1177 with NMDA vs NMDA-BMS (**h**). Gene Ontology (GO) terms for the enriched genes in

1178 the BMS treated and BMS+NMDA treated were compiled (ShinyGO) and grouped by

1179 biological process, cellular component and molecular function. GO enrichment analysis

1180 was performed. The significance of the function and the number of enriched genes are

1181 listed for each GO category.

1182

1183

1184

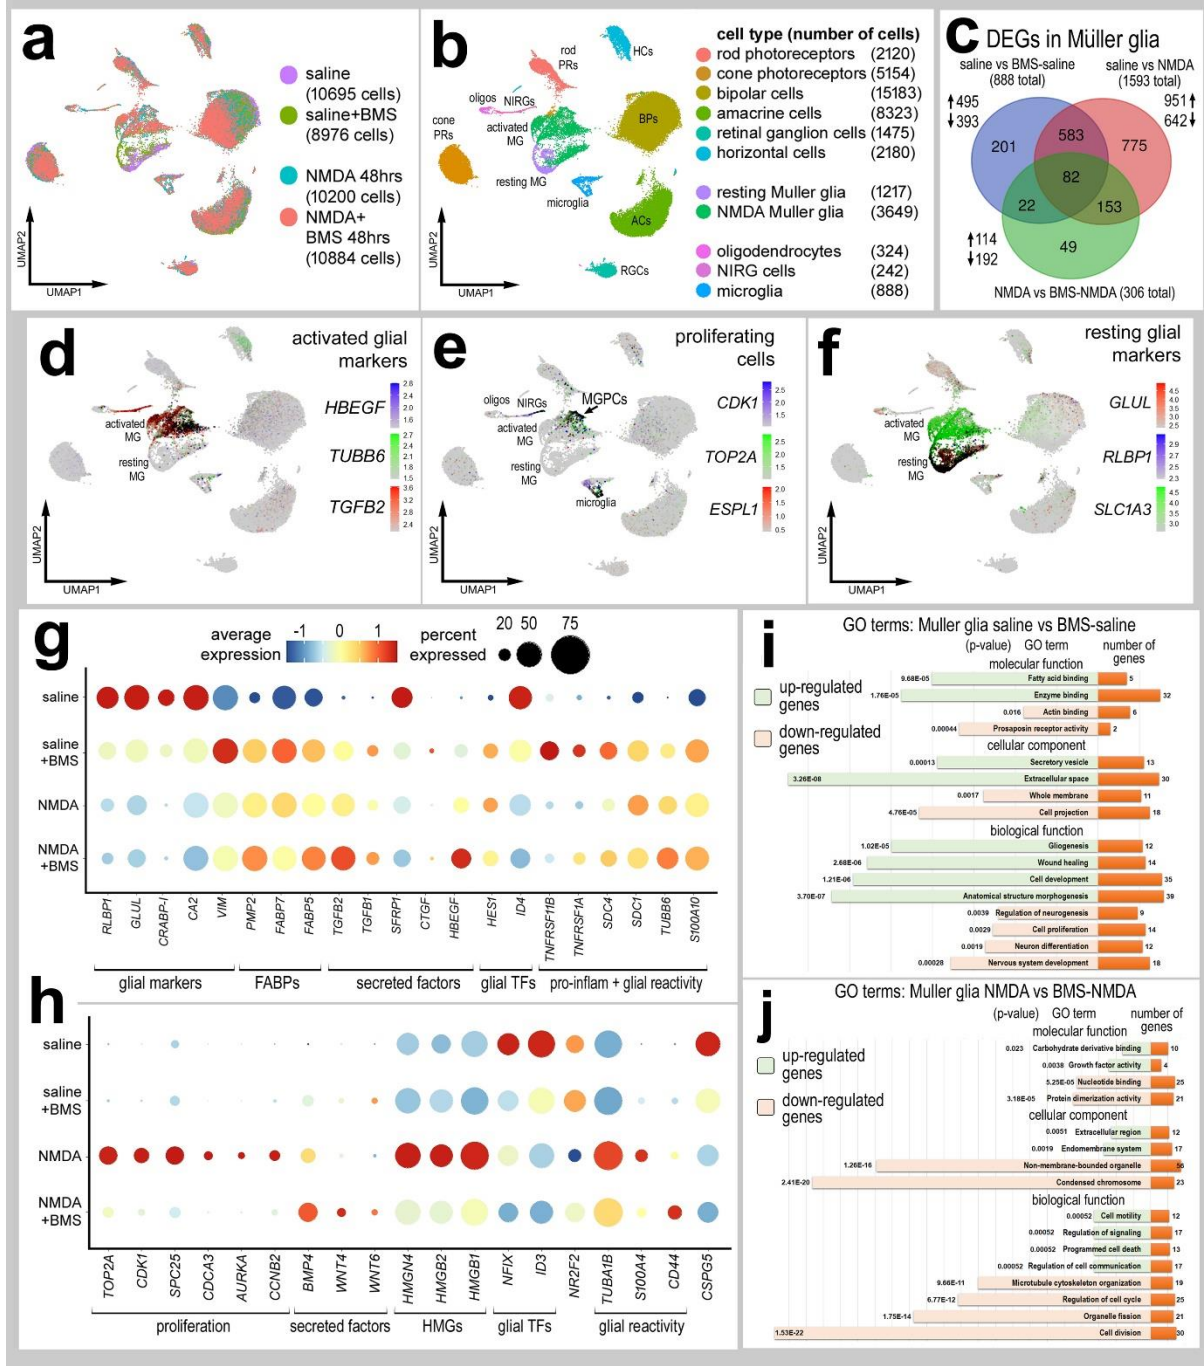

1185

1186

1187

1188

1189

1190 **Figure 8.** Ligand-receptor (LR) interactions inferred from scRNA-seq data between  
1191 microglia, NIRG cells, resting MG, activated MG and MGPCs. Retinal glia were isolated,  
1192 re-embedded and ordered in UMAP plots to reveal distinct clusters of cells (**a, b**). The  
1193 resting MG were comprised primarily of MG from saline-treated retinas, activated MG  
1194 were comprised of cells from BMS-saline, NMDA and BMS-NMDA treated retinas, and  
1195 MGPCs were primarily comprised of cells from NMDA-treated retinas (**a-c**). Glia from  
1196 different treatment groups were analyzed using SingleCellSignalR to generate chord  
1197 diagrams and illustrate potential autocrine and paracrine LR-interactions (**d-g**). LR-  
1198 interactions were identified for glial cells for different treatment groups including saline  
1199 (**h,l**), BMS-saline (**i,m**), NMDA (**j,n**) and BMS-NMDA (**k,o**). For each treatment group,  
1200 the 40 most significant LR-interactions between microglia to resting MG (**h,i**), microglia  
1201 to NIRG cells (**l**), microglia to activated MG (**j,k,m**), and activated MG to MGPCs (**n-o**)  
1202 were identified and illustrated in chord plots and LRscore heat maps. Treatment-specific  
1203 differences in glial LR-interactions in saline vs BMS-saline (**p**) and NMDA vs BMS-  
1204 NMDA (**q**) are illustrated in Venn diagrams with some key interactions listed.  
1205



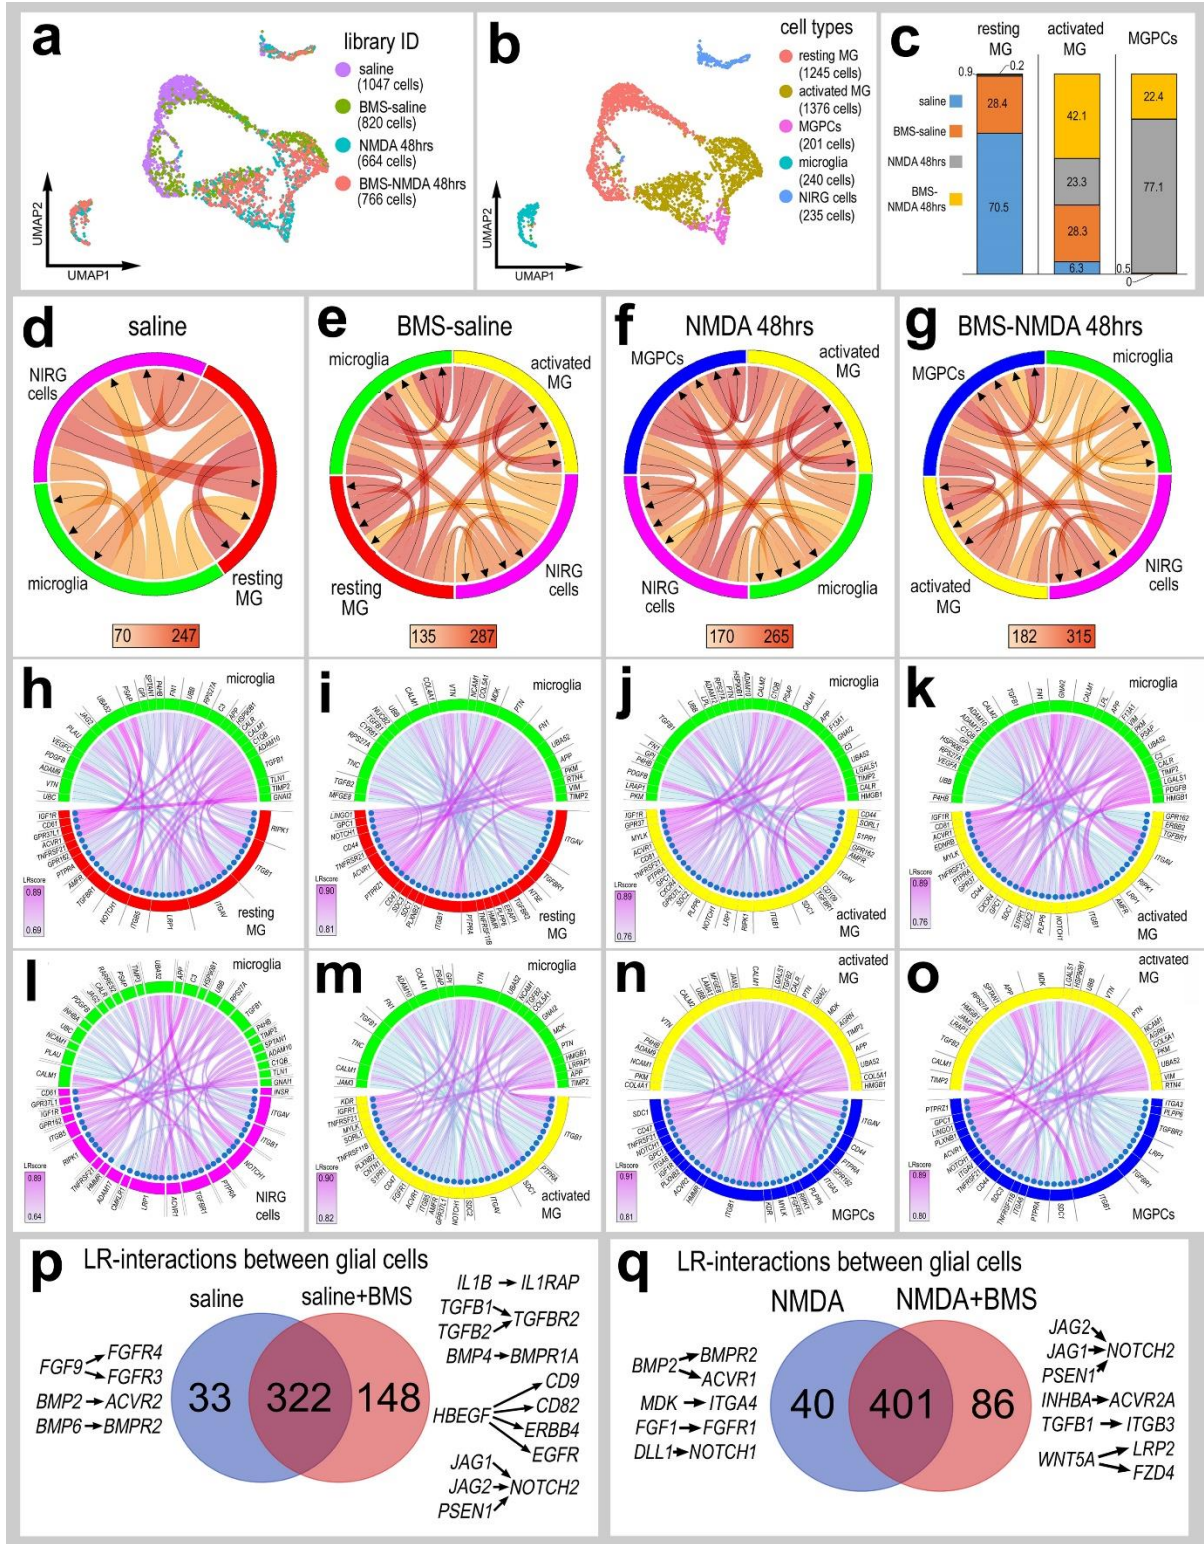

1206

1207

1208

1209

1210 **Figure 9. (a-b)** Inhibition of FABPs suppresses multiple cell signaling pathways in  
1211 NMDA-damaged retinas. BMS309403 or vehicle were injected at P6 with NMDA,  
1212 followed by injection of vehicle or BMS309403 at P7, and retinas were harvested 4  
1213 hours after the last injection. **(a)** Retinal sections were labeled for fragmented DNA  
1214 (TUNEL; red) or antibodies to pS6 (green) and Sox2 (red), pStat3 (green), or  
1215 pSmad1/5/8 (green). The histograms in **b** illustrate numbers of dying cells or  
1216 immunofluorescence intensity sum for pS6, pStat3, and pSmad1/5/8. **(c-d)** Inhibition of  
1217 FABPs in undamaged retinas up-regulates vimentin and PMP2 in MG, and suppresses  
1218 the formation of MGPCs when damage is induced. Sections of the retina were labeled  
1219 with antibodies to vimentin or PMP2 **(c)**. The histogram in **d** illustrates levels of  
1220 immunofluorescence intensity sum for vimentin and PMP2. **(e-f)** BMS309403 was  
1221 injected at P6 and P7, NMDA was injected at P8, EdU was injected at P9 and P10, and  
1222 retinas were harvested at P11. Retinal sections were labeled for EdU and antibodies to  
1223 Sox2 **(e)**. Arrows indicate the nuclei of MG labeled for Sox2 and EdU in the INL, hollow  
1224 arrow-heads indicate the nuclei of NIRG cells labeled for Sox2 and EdU in the IPL, and  
1225 small double-arrows indicate putative proliferating microglia labeled for EdU alone. The  
1226 calibration bars in **a, c** and **e** represents 50  $\mu$ m. The histogram in **f** illustrates numbers  
1227 of Sox2+/EdU+ MGPCs. Abbreviations: ONL – outer nuclear layer, INL – inner nuclear  
1228 layer, IPL – inner plexiform layer, GCL – ganglion cell layer. The histograms illustrated  
1229 the mean ( $\pm$  SD) and each dot represents one biological replicate retina. Significance  
1230 ( $*p<0.05$ ,  $**p<0.01$ ,  $***p<0.001$ ) of difference was determined by using a Student's t-  
1231 test.

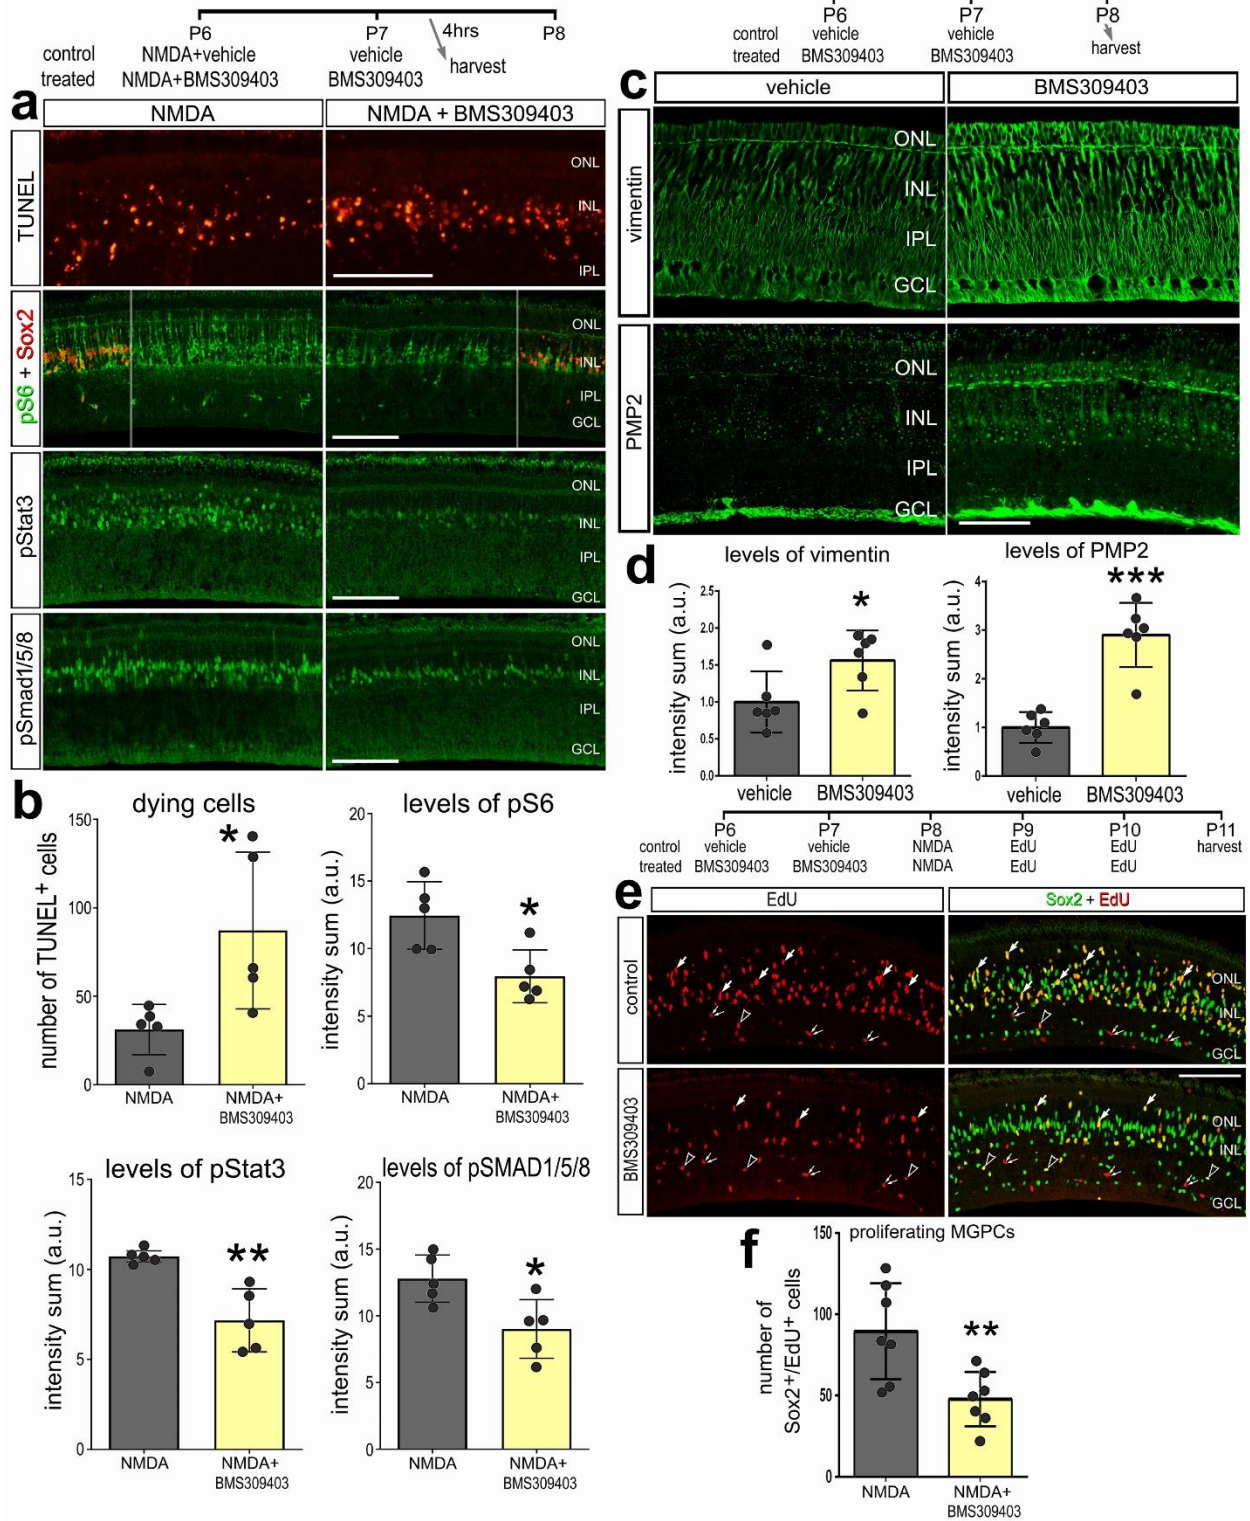

1232

1233

1234

1235 **Figure 10. FABP inhibition reduces microglia proliferation.** Inhibition of FABPs with  
1236 BMS309403 suppressed the accumulation and proliferation of microglia (**a,b**). Sections  
1237 of the retina were labeled for DRAQ5 (red) and CD45 (green; **a**). The calibration bar in **a**  
1238 represents 50  $\mu$ m. Abbreviations: ONL – outer nuclear layer, INL – inner nuclear layer,  
1239 IPL – inner plexiform layer, GCL – ganglion cell layer. The histogram in **b** represents the  
1240 mean ( $\pm$  SD) number of CD45+/EdU+ cells and each dot represents one biological  
1241 replicate. Significance of difference (\* $p$ <0.01) was determined using a two-way paired t-  
1242 test. scRNA-seq libraries established from retinas treated with saline  $\pm$  BMS or NMDA  $\pm$   
1243 BMS and microglia were isolated and analyzed for changes in genes expression. The  
1244 microglia were clustered by UMAP and analyzed for differentially expressed genes  
1245 (DEGs) which are illustrated in a Venn diagram (**g**). Dot plots indicating the percentage  
1246 of expressing microglia (size) and expression level (heatmap) were generated for  
1247 classes of genes including those important for proliferation, transcriptional regulation,  
1248 cell signaling and inflammatory signaling (**e**). All genes displayed in the dot plot have  
1249 significantly different ( $p$ <0.0001) expression levels in microglia from retinas treated with  
1250 saline vs saline-BMS. Gene Ontology terms for the enriched genes in the BMS treated  
1251 and BMS+NMDA treated were compiled (ShinyGO) (**g,h,i**). GO was performed for  
1252 significantly up-regulated genes (green) and the number of enriched genes in each GO  
1253 category (orange) are displayed. There were insufficient numbers of down-regulated  
1254 genes and insufficient DEGs identified for NMDA vs NMDA+BMS to perform GO  
1255 enrichment analyses. Violin plots of *FABP5*, *FABP7*, *PMP2* and *FASN* illustrate the  
1256 percentage of expressing cells and significant changes in levels of expression between

1257 treatment groups (f). Significance of difference (\* $p < 0.01$ , \*\* $p < 0.001$ , \*\*\* $p < 0.001$ ) was  
 1258 determined by using a Wilcoxon rank sum with Bonferroni correction.

1259

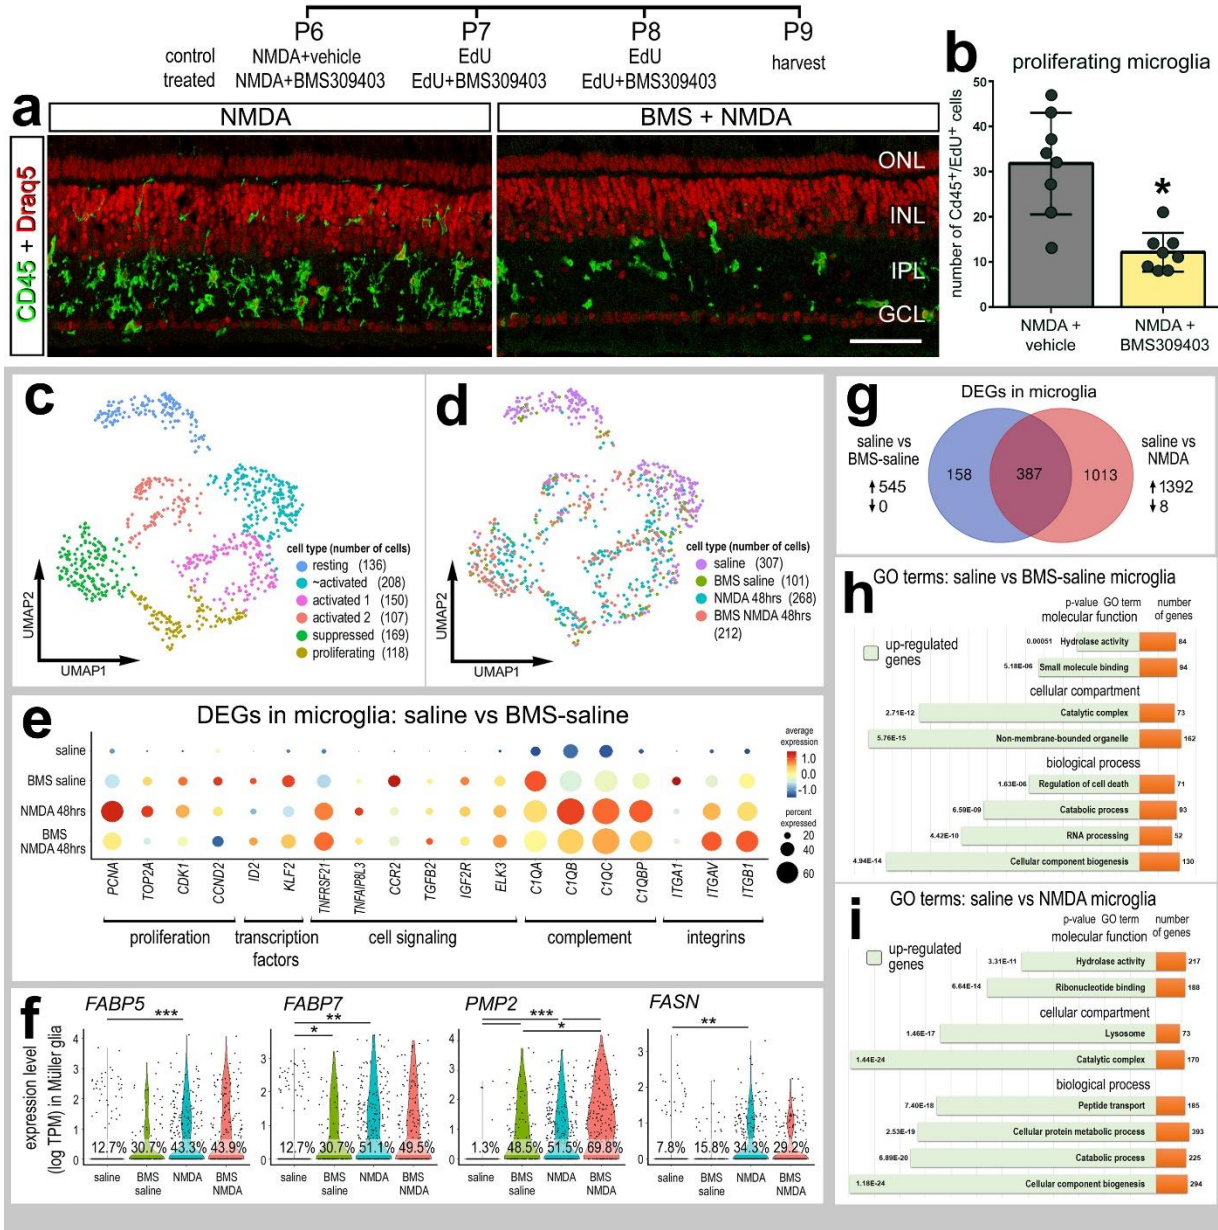

1260

1261

1262

1263

1264

1265

1266 **Figure 11. Fatty acids synthase inhibitors significantly reduce MGPC formation.**

1267 scRNA-seq libraries of the NMDA damaged retinas were probed Fatty acids synthase

1268 (FASN). UMAP heatmap plot in **a** illustrate FASN expression across different cells types

1269 from retinas treated with saline or NMDA at 24, 48 or 72 hrs after treatment. Expression

1270 levels and percentage expressing cells in MG are illustrated in violin plots (**b,d**). The

1271 UMAP plot in **c** illustrates discrete clustering of MG from retinas treated with saline or

1272 NMDA at 3, 12 or 48 hrs after treatment. FASN inhibitors C75 and G28UCM were

1273 applied either with or following NMDA. Retinal sections were labeled for EdU (red) and

1274 Sox2 (green; **e**), TUNEL (**h**), or DRAQ5 (magenta), EdU (red) and CD45 (green; **k,l**).

1275 Arrows indicate nuclei of MG, small double-arrows nuclei of NIRG cells and hollow

1276 arrow-heads indicate nuclei of microglia. The histograms **f, g, i, j** and m-p represents

1277 the mean ( $\pm$  SD) and each dot represents one biological replicate retina. The calibration

1278 bar in **c** represents 50  $\mu$ m. Abbreviations: ONL – outer nuclear layer, INL – inner

1279 nuclear layer, IPL – inner plexiform layer, GCL – ganglion cell layer. Significant

1280 changes ( $*p<0.01$ ,  $**p<0.001$ ,  $***p<0.0001$ ) in expression were determined by using a

1281 Wilcox rank sum with Bonferroni correction.

1282

1283

1284

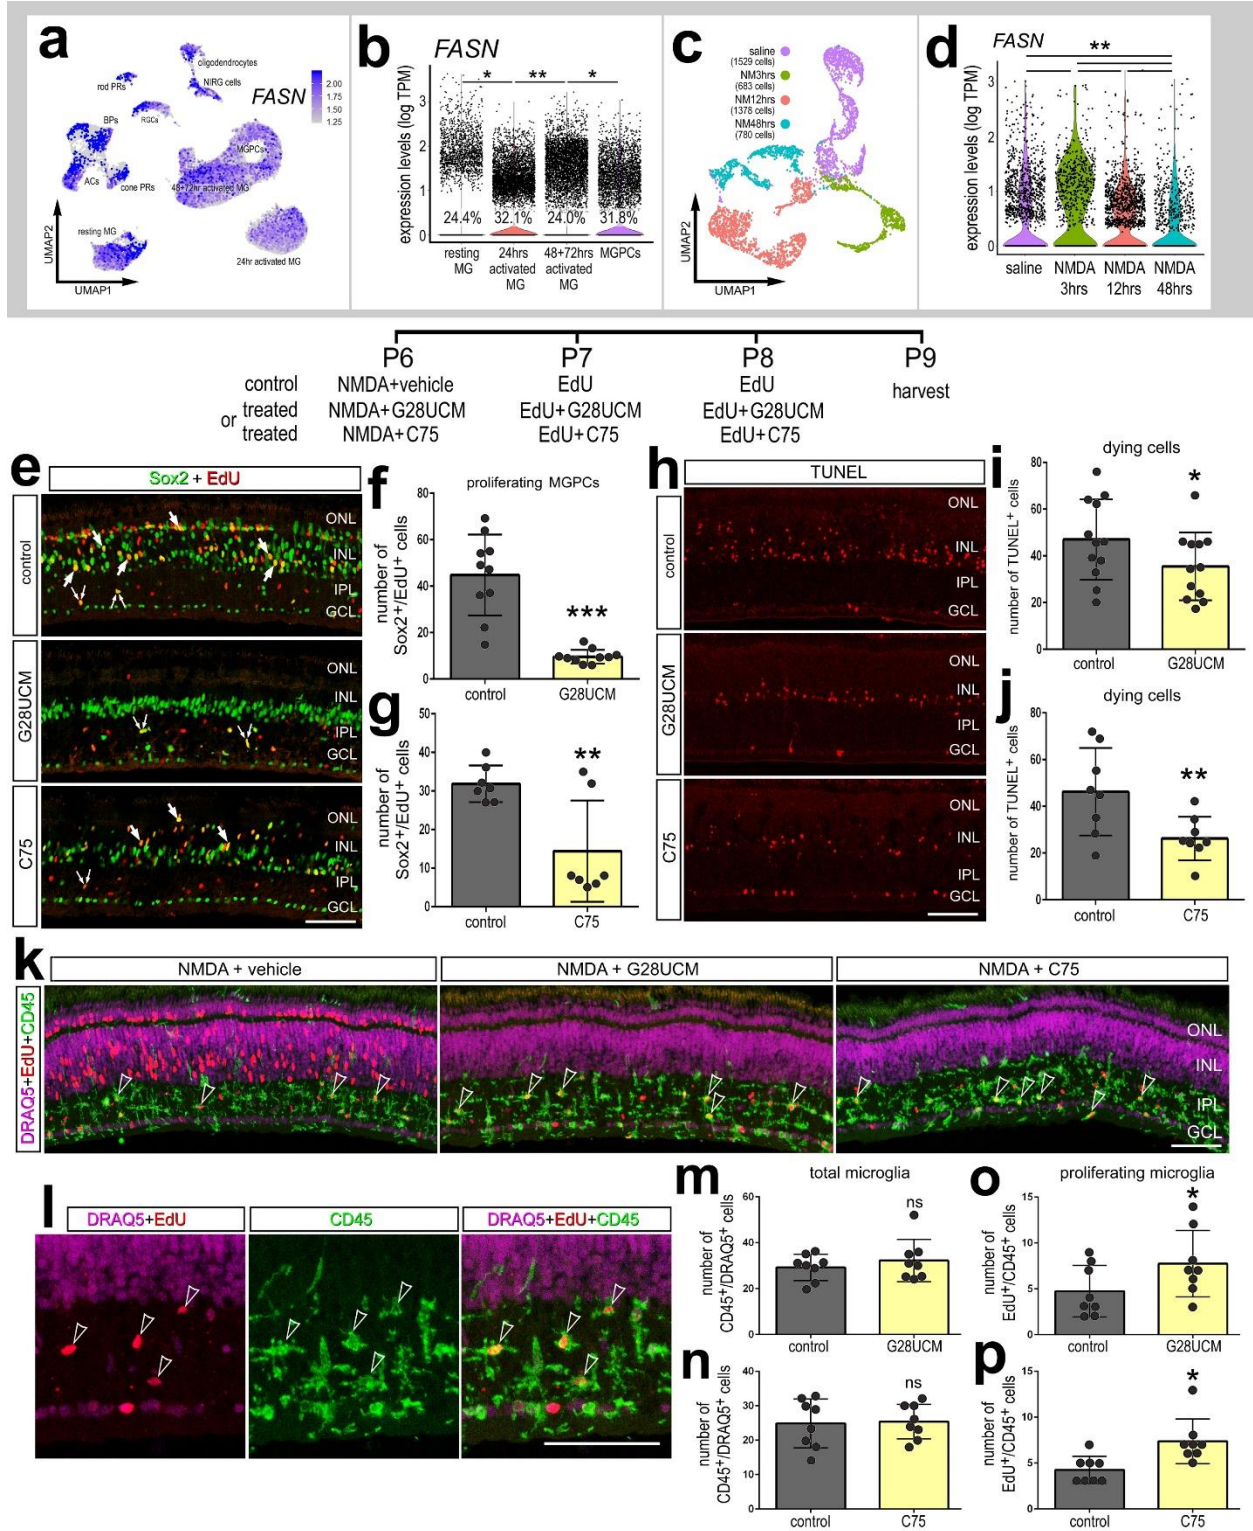

1285

1286

1287

1288 **Figure 12.** Inhibition of FASN suppresses cell signaling in MG. Retinas were obtained  
1289 from eye injected with NMDA  $\pm$  G28UCM (FASN inhibitor) at P7, vehicle  $\pm$  G28UCM  
1290 and harvested 4 hours after the last injection. Retinal sections were labeled for Sox2  
1291 (red) and pS6 (green), pStat3 (green), pSmad1/5/8 (green), and fragmented DNA in the  
1292 nuclei of dying cells (**a**). Arrows indicate the nuclei of MG. The calibration bar in **a**  
1293 represents 50  $\mu$ m. Abbreviations: ONL – outer nuclear layer, INL – inner nuclear layer,  
1294 IPL – inner plexiform layer, GCL – ganglion cell layer. The histograms represent the  
1295 mean ( $\pm$  SD) fluorescence intensity sum (a.u.; **b**) or mean number of TUNEL+ cells (**c**)  
1296 and each dot represents one biological replicate retina. Significance (p-values) of  
1297 difference was determined by using a two-tailed paired Student's t-test.



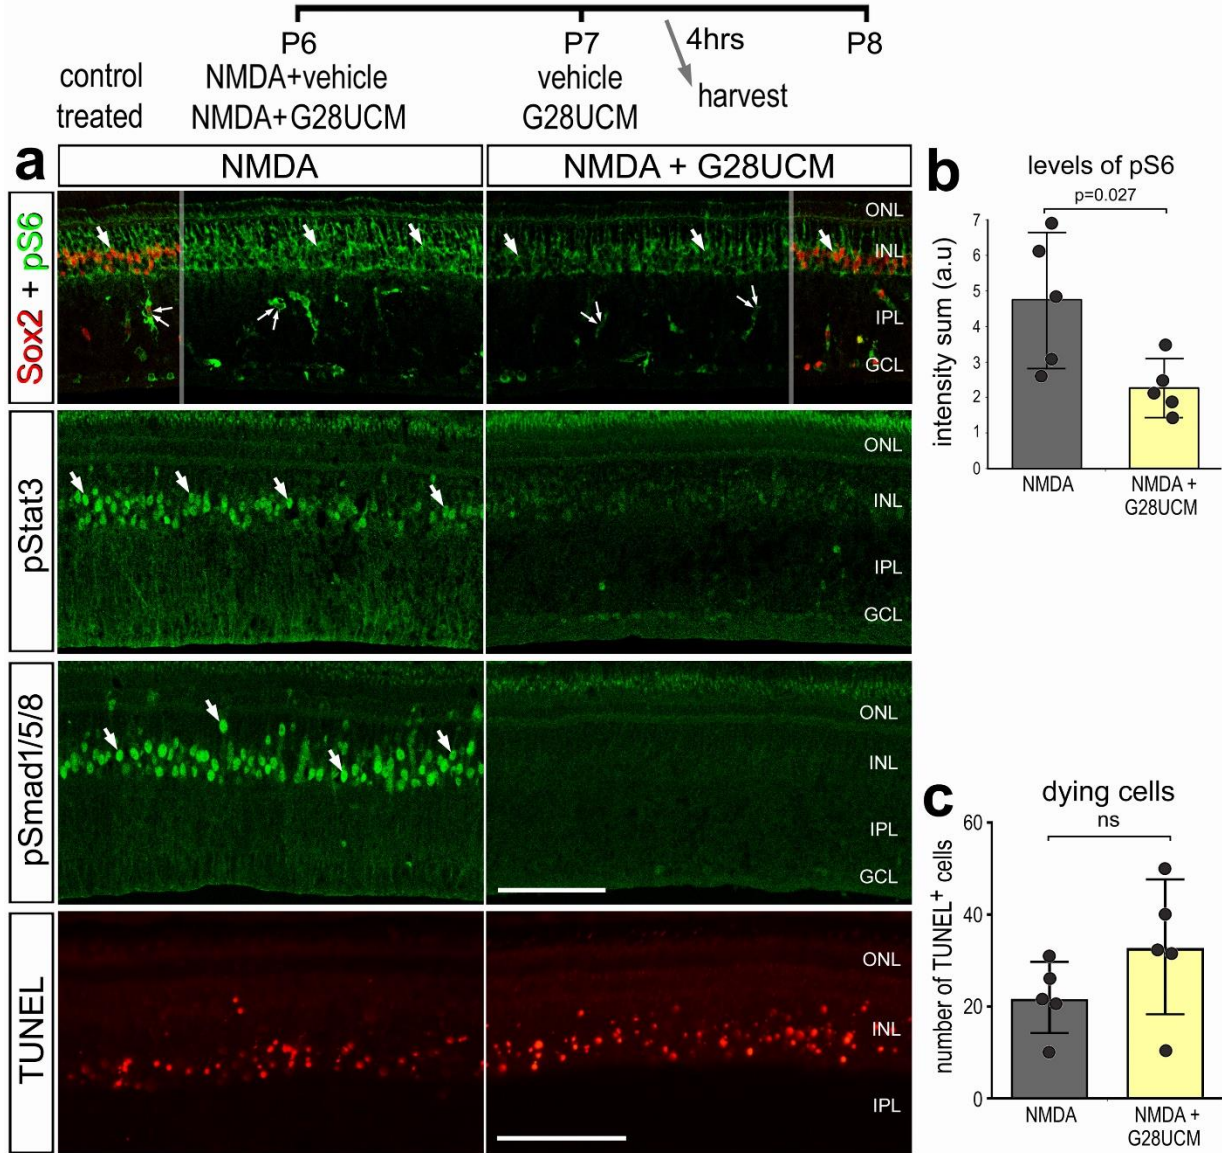

1298

1299

1300

1301

1302

1303

1304

1305

1306 **Supplemental Figure 1.** scRNA-seq was used to interrogate expression of FABPs in  
1307 MG at timepoints soon after damage. Retinas were harvested at 3, 12 or 48 hrs after  
1308 treatment with NMDA. UMAP plots illustrate the distribution of different libraries (saline,  
1309 4hrs, 12hrs and 48hrs after NMDA) (**a**). UMAP ordering of cells revealed 7 different  
1310 clusters of cells (**b**). Resting MG were identified based on elevated levels of expression  
1311 for *CA2*, *RLBP1*, *GLUL* and *CSPG5*, whereas activated MG down-regulated these  
1312 markers (**c**). MGPCs were identified based on expression of proliferation markers  
1313 including *SPC25*, *CDCA3*, *TOP2A* and *CDK1* (**d**). UMAP heatmap plots illustrate  
1314 patterns of expression of *FABP5* (**e**), *FABP7* (**f**) and *PMP2* (**g**). Expression levels (log  
1315 TPM) and the percentage of expressing MG are illustrated in violin plots (**h**).  
1316 Significance (\* $p < 0.01$ , \*\*\* $p < 0.0001$ ) of difference in expression was determined by  
1317 using a Wilcox rank sum with Bonferroni correction.  
1318

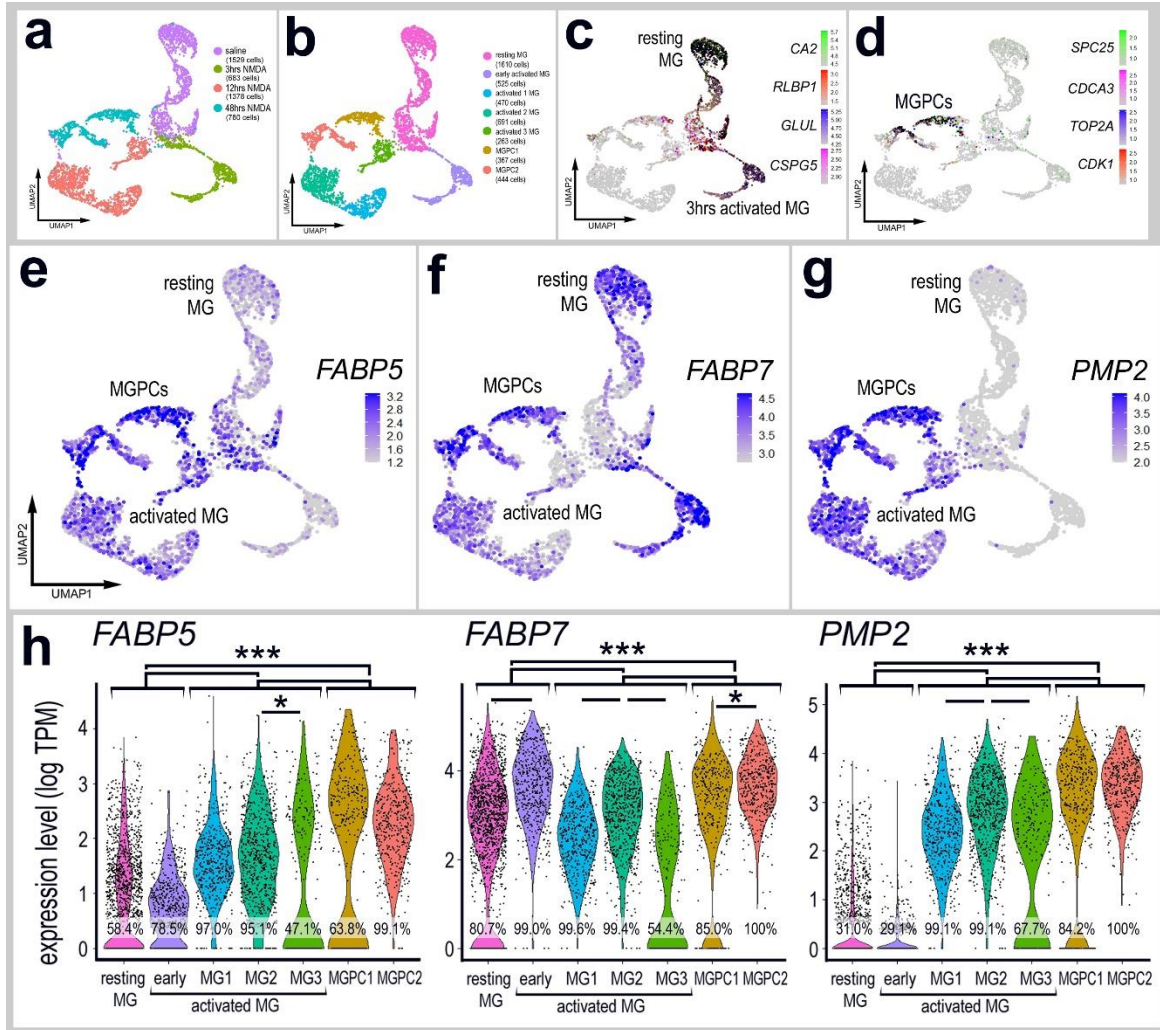

1319

1320

1321

1322

1323

1324

1325

1326

1327

1328

1329

1330 **Supplemental Figure 2.** Comparison of *FABP* and *FASN* expression levels in MG and  
1331 MGPCs from different treatment conditions. scRNA-seq was used to identify patterns of  
1332 expression of *FABPs* and *FASN* in MG and MGPCs at different time points after NMDA  
1333 damage and/or FGF + insulin growth factor treatment. Nine different libraries were  
1334 aggregated for a total of more than 55,000 MG and MGPCs (**a-c**). MGPCs were  
1335 identified based on high-levels of expression of *CDK1*, *TOP2A*, *PCNA* and *SPC25* (**e**),  
1336 and were a mix of cells from 48hrs NMDA+FGF2+insulin, 48hrs NMDA, 72hrs NMDA  
1337 and 3 doses of insulin+FGF2 (**b**). Resting MG were identified based on expression of  
1338 *GLUL*, *RLBP1*, *SLC1A3* and *VIM* (**c,d**). Each dot represents one cell and black dots  
1339 indicate cells with 2 or more genes expressed. The expression of *FABP5*, *FABP7*,  
1340 *PMP2* and *FASN* is illustrated UMAP and violin plots with population percentages and  
1341 statistical comparisons (**f-h**). Significance of difference ( $***p < 10^{-20}$ ) in expression levels  
1342 (log TPM) were determined by using a Wilcox rank sum with Bonferoni correction.  
1343 Abbreviations: ONL –outer nuclear layer, INL –inner nuclear layer, IPL –inner plexiform  
1344 layer, GCL –ganglion cell layer.  
1345  
1346

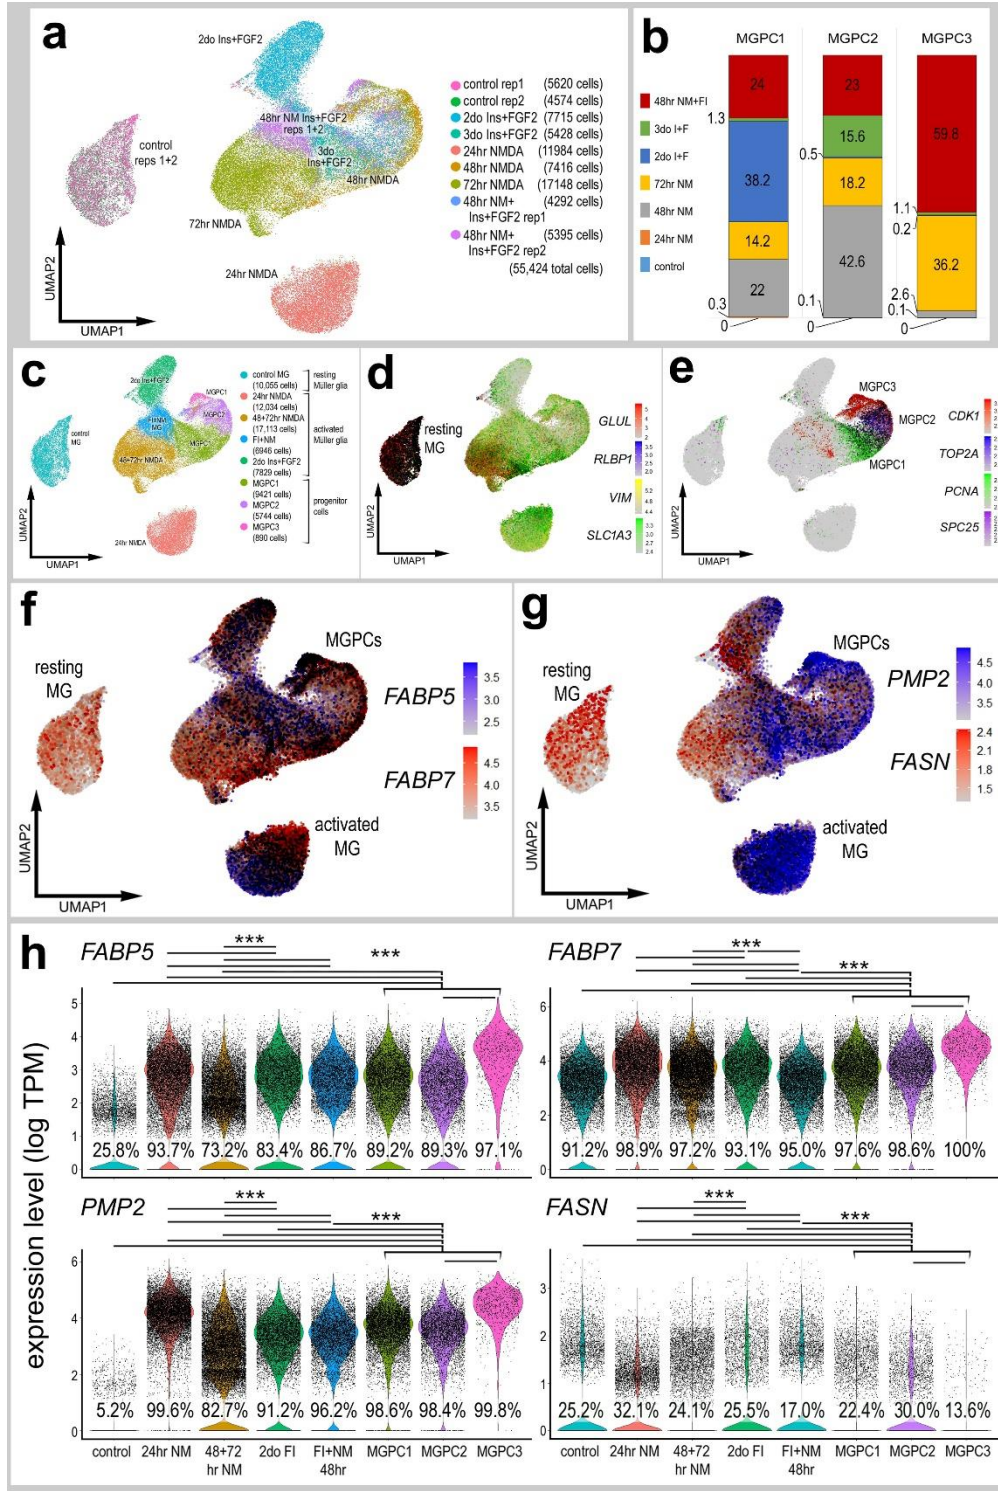

1347

1348

1349

1350

1351 **Supplemental Figure 3.** scRNA seq libraries were generated to analyze changes in  
1352 MG gene expression. MG were identified based on expression of genes associated with  
1353 resting glia, activated glia, and proliferating MGPCs. UMAP ordering of MG revealed 2  
1354 clusters of resting MG, 2 clusters of activated MG, and one cluster of MGPCs (**a**).  
1355 Resting MG clusters were predominantly occupied by MG from saline-treated retinas,  
1356 activated MG clusters were occupied by cells treated with saline-BMS, NMDA alone and  
1357 NMDA-BMS, and the MGPC cluster was predominantly occupied by cells from NMDA-  
1358 treated retinas (**b,c**). Resting MG were identified based on expression of markers such  
1359 as *CA2*, *GLUL* and *RLBP1* (**d**). MGPCs were identified based on expression of  
1360 proliferation markers such as *CDK1*, *SPC25* and *TOP2A* (**e**). Activated MG were  
1361 identified based on expression of markers such as *CD44*, *MANF* and *TGFB2* (**f**).  
1362 Differentially expressed genes (DEGs) were identified for MG from retinas treated with  
1363 saline vs BMS-saline, saline vs NMDA, and NMDA vs BMS-NMDA and plotted in a  
1364 Venn diagram (**i**). The Dot plot plots indicating the percentage of expressing MG (size)  
1365 and expression levels (heatmap) for genes related to resting glia, secreted factors, glial  
1366 transcription factors, inflammation, glial reactivity and proliferation (**g, h**). All genes  
1367 displayed in the Dot plot have significantly different ( $p < 0.0001$ ) expression levels in MG  
1368 from retinas treated with saline vs saline-BMS (**g**). Gene Ontology (GO) terms for the  
1369 enriched genes in the BMS treated and BMS+NMDA treated were compiled (ShinyGO)  
1370 and grouped by biological process, cellular component and molecular function. GO  
1371 enrichment analysis was performed for up-regulated DEGs (light green) and down-  
1372 regulated DEGs (light orange). The significance of the GO category and the number of  
1373 enriched genes grouped into each function (orange) are displayed.  
1374

1375

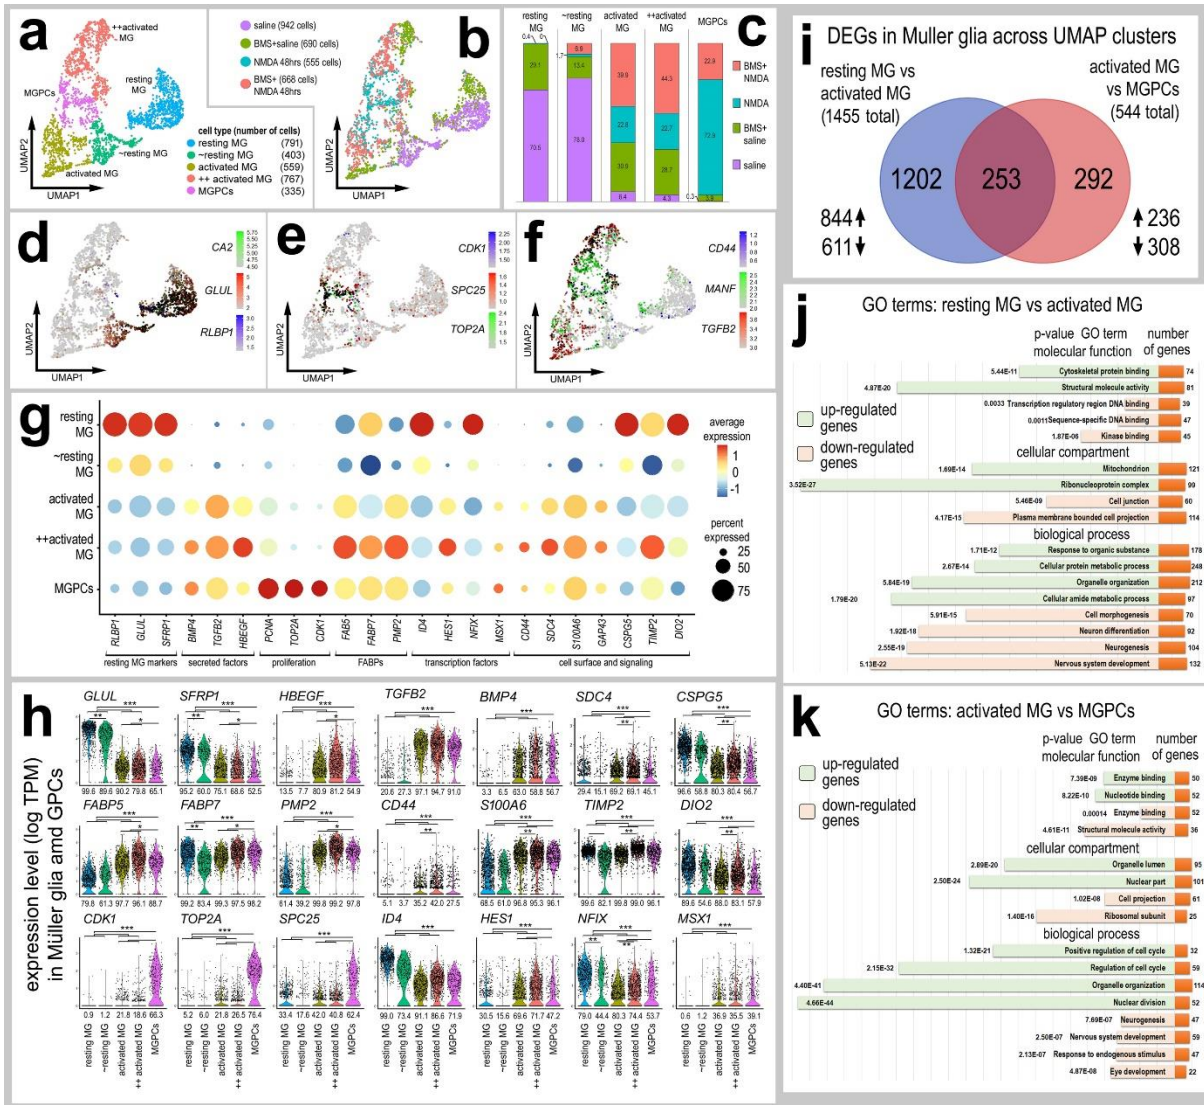

1376

1377

1378

1379
